# Supplementary material for: Association between socioeconomic status and survival in patients with hepatocellular carcinoma
Source: PubMed Central journal article supplement (PMC8525159; doi:10.1002/cam4.4223), 2021-08-20

A

### Survival curve of age (P=0)

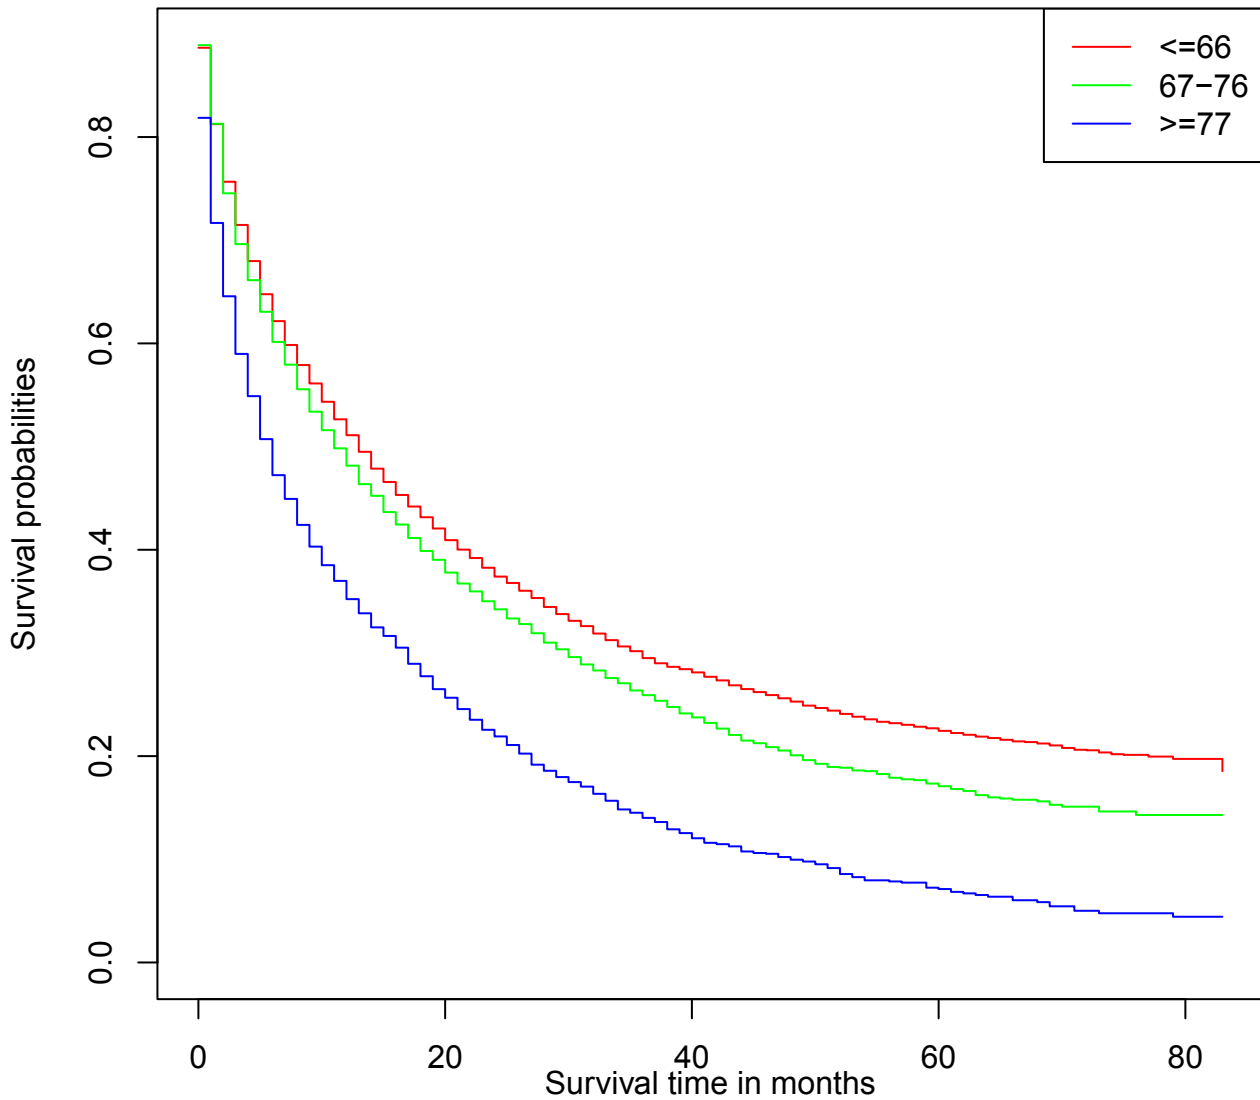

B

### Survival curve of race (P=0)

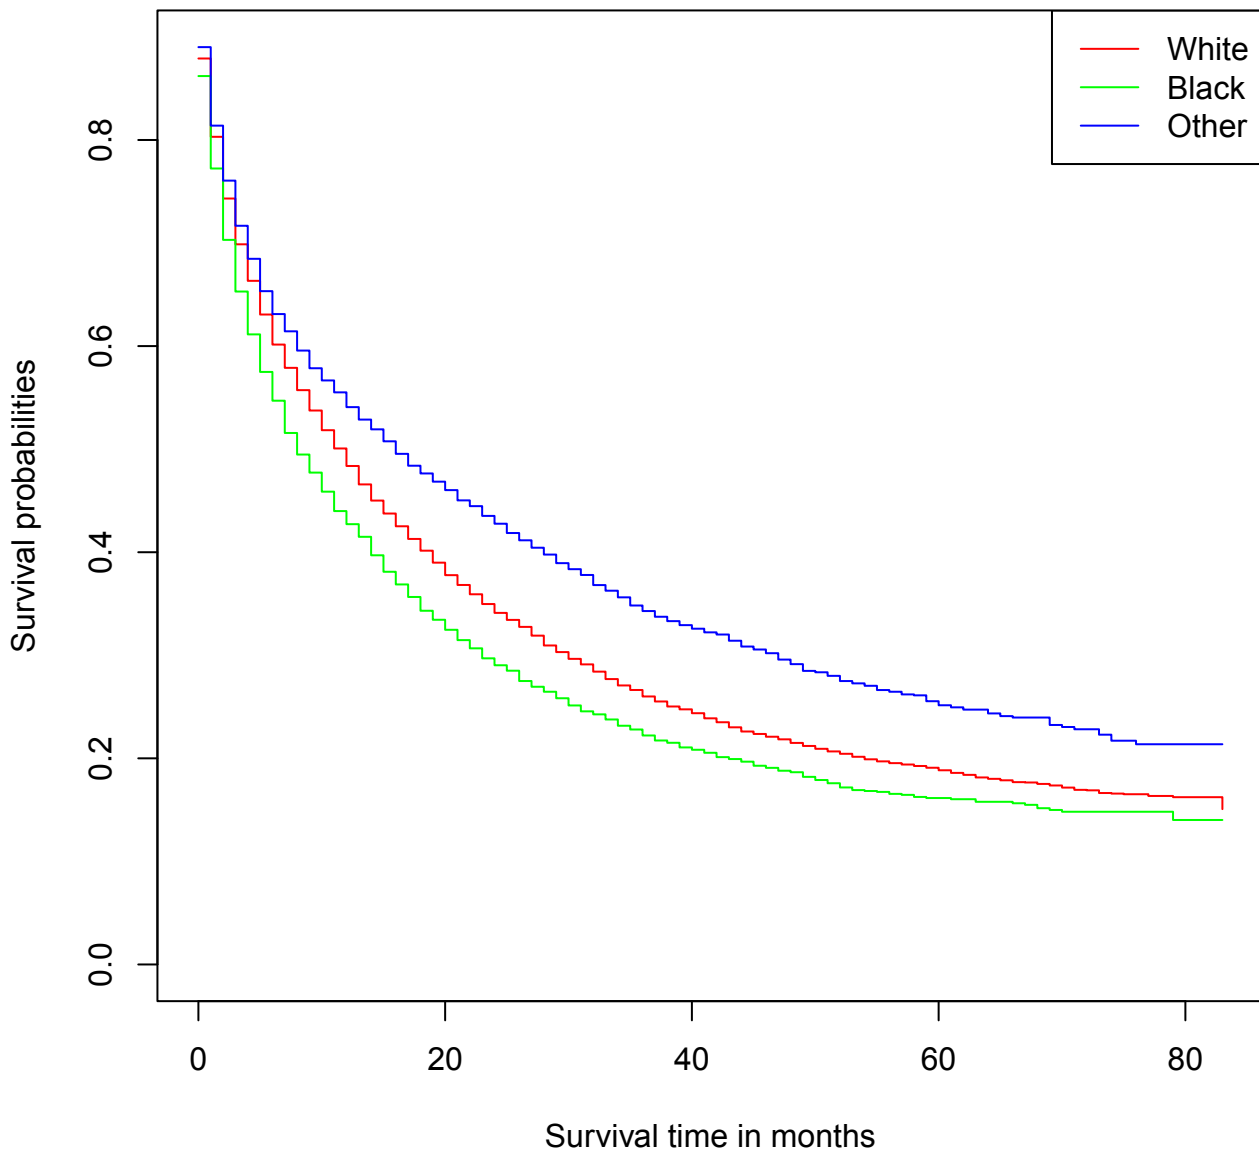

C

### Survival curve of sex (P=0)

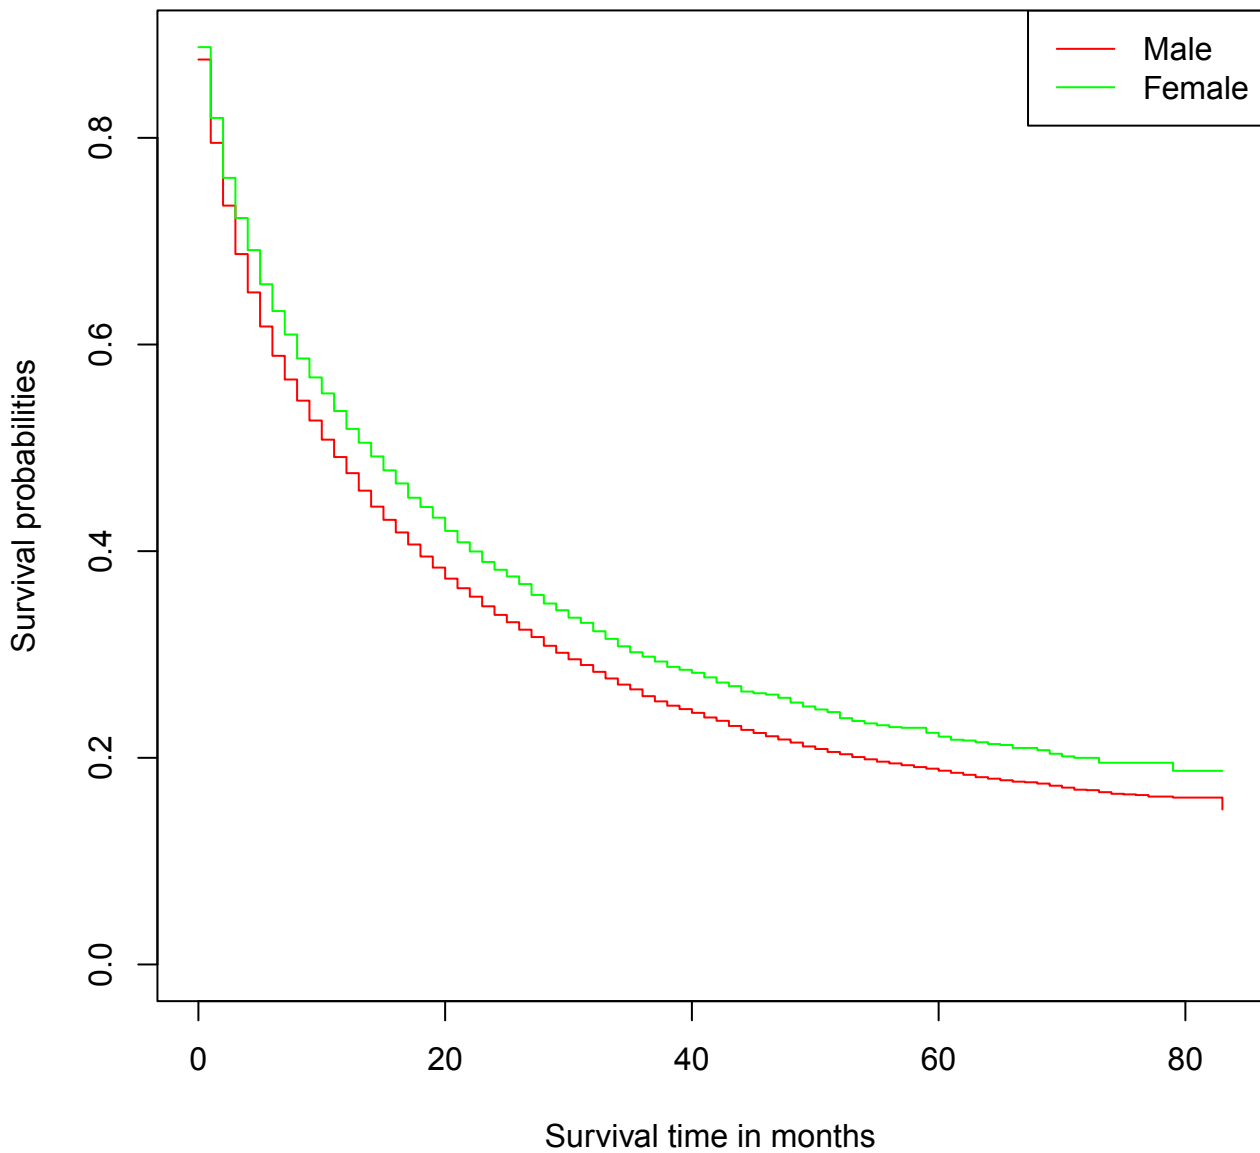

D

### Survival curve of COLI (P=0)

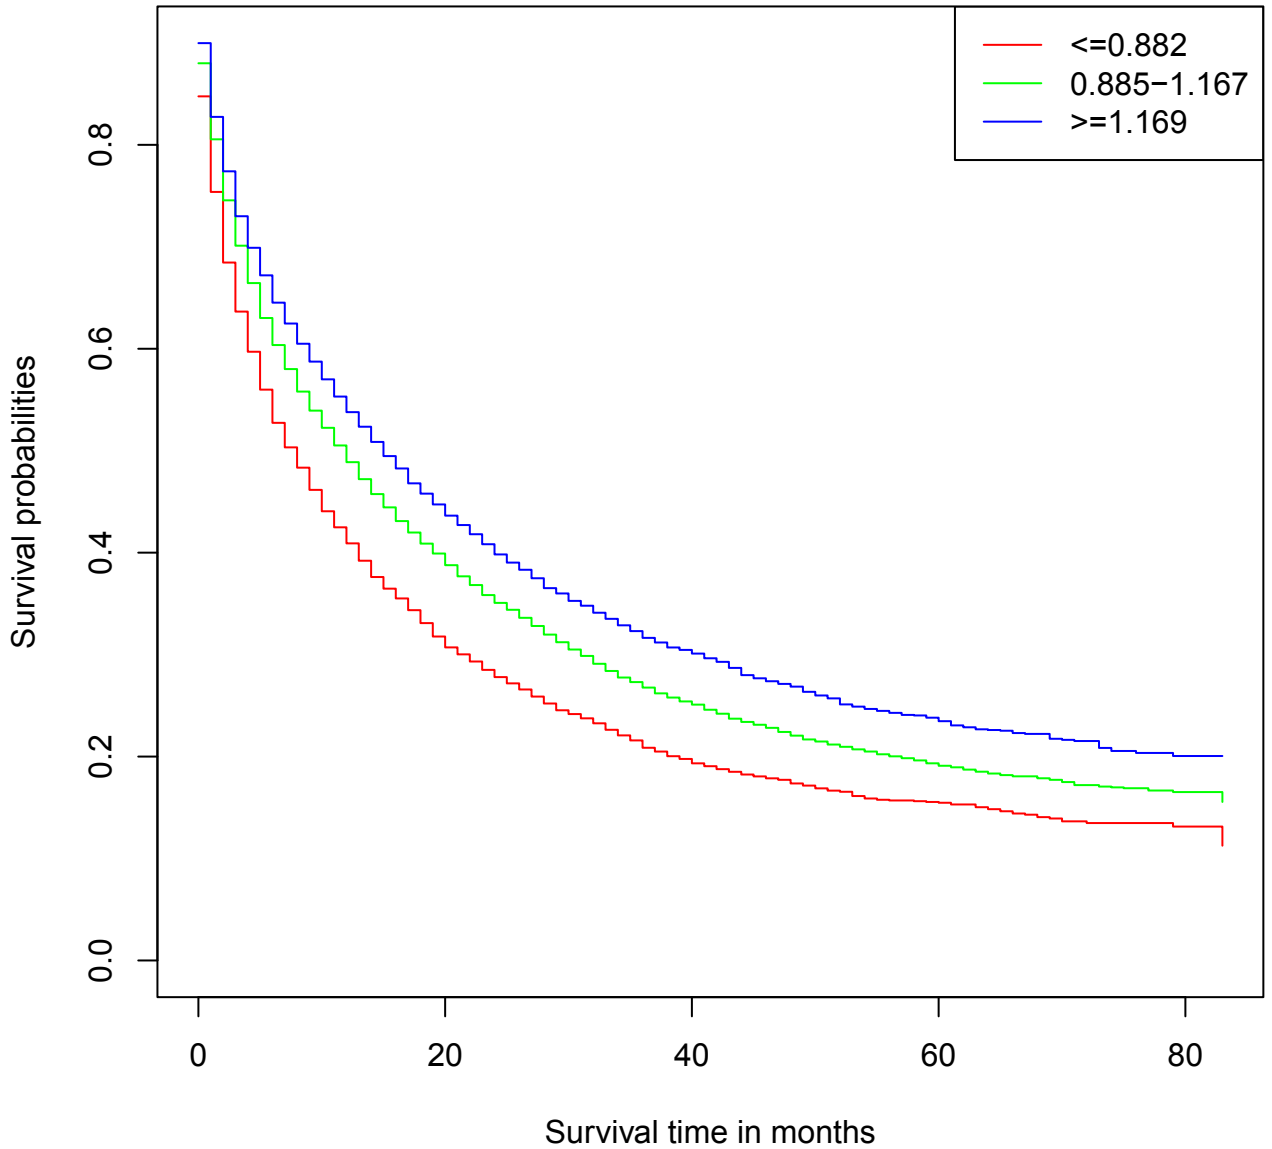

E

### Survival curve of education (P=0)

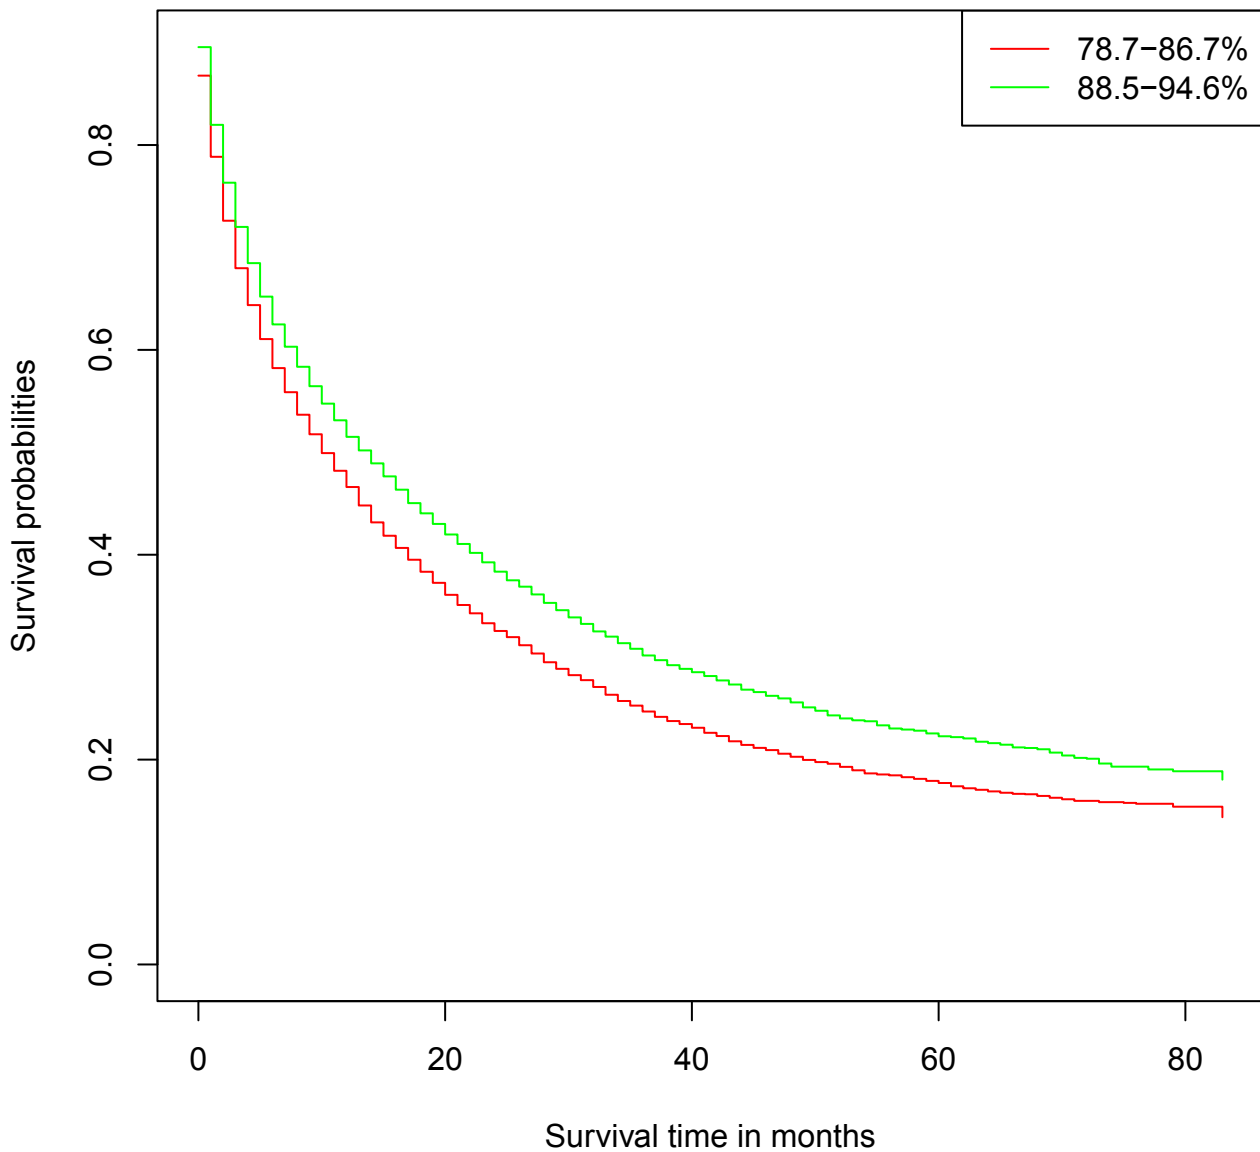

F

## Survival curve of income (P=0)

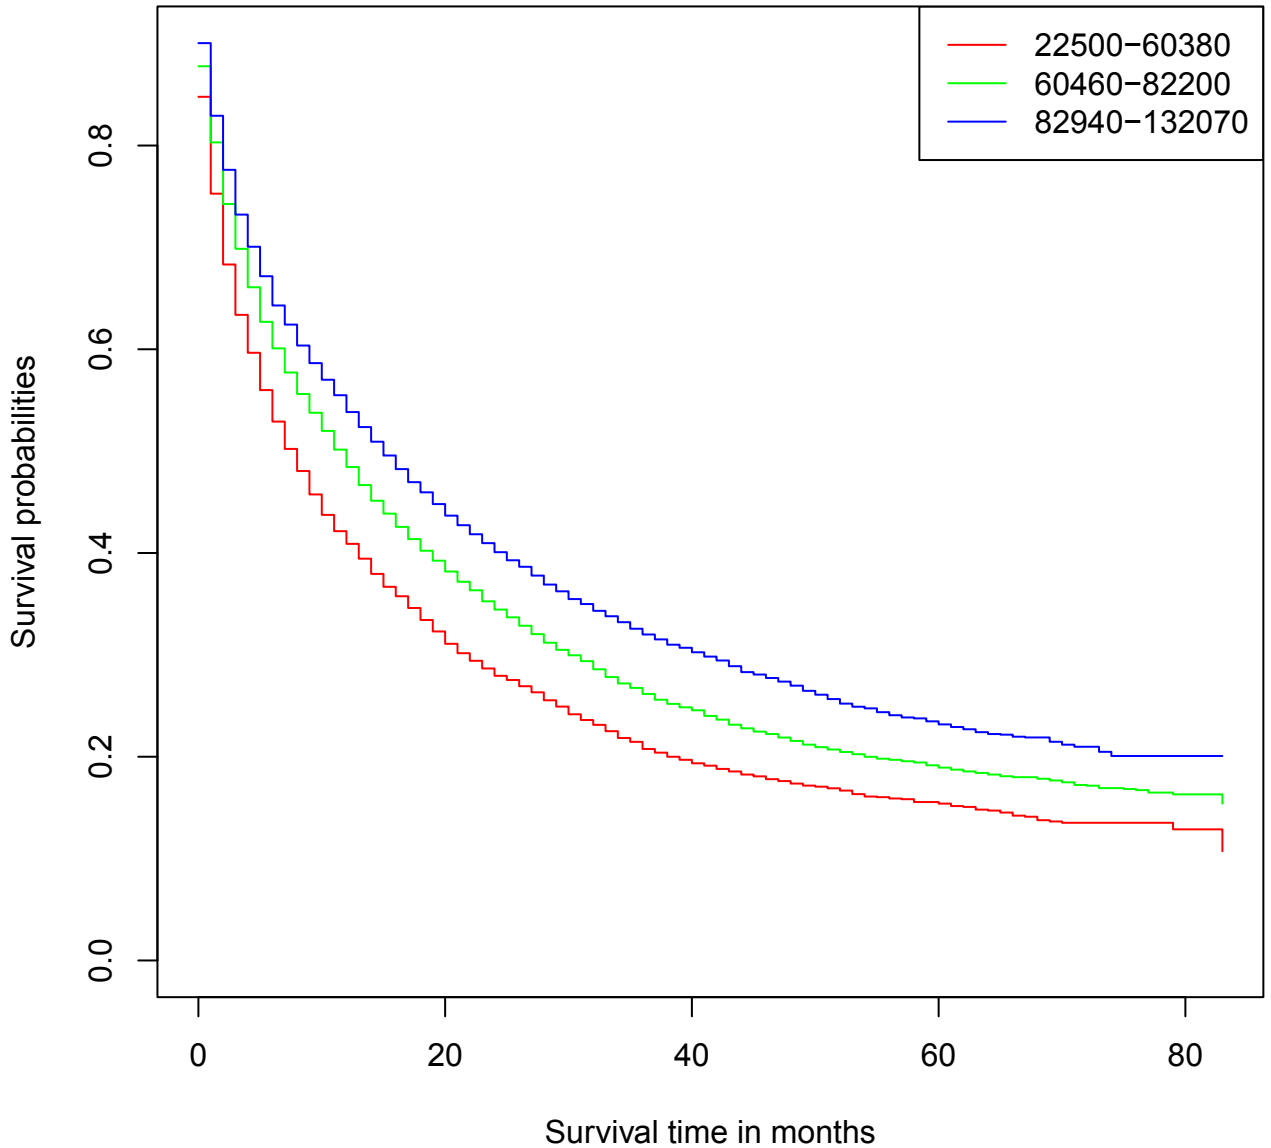

G

## Survival curve of marital (P=0)

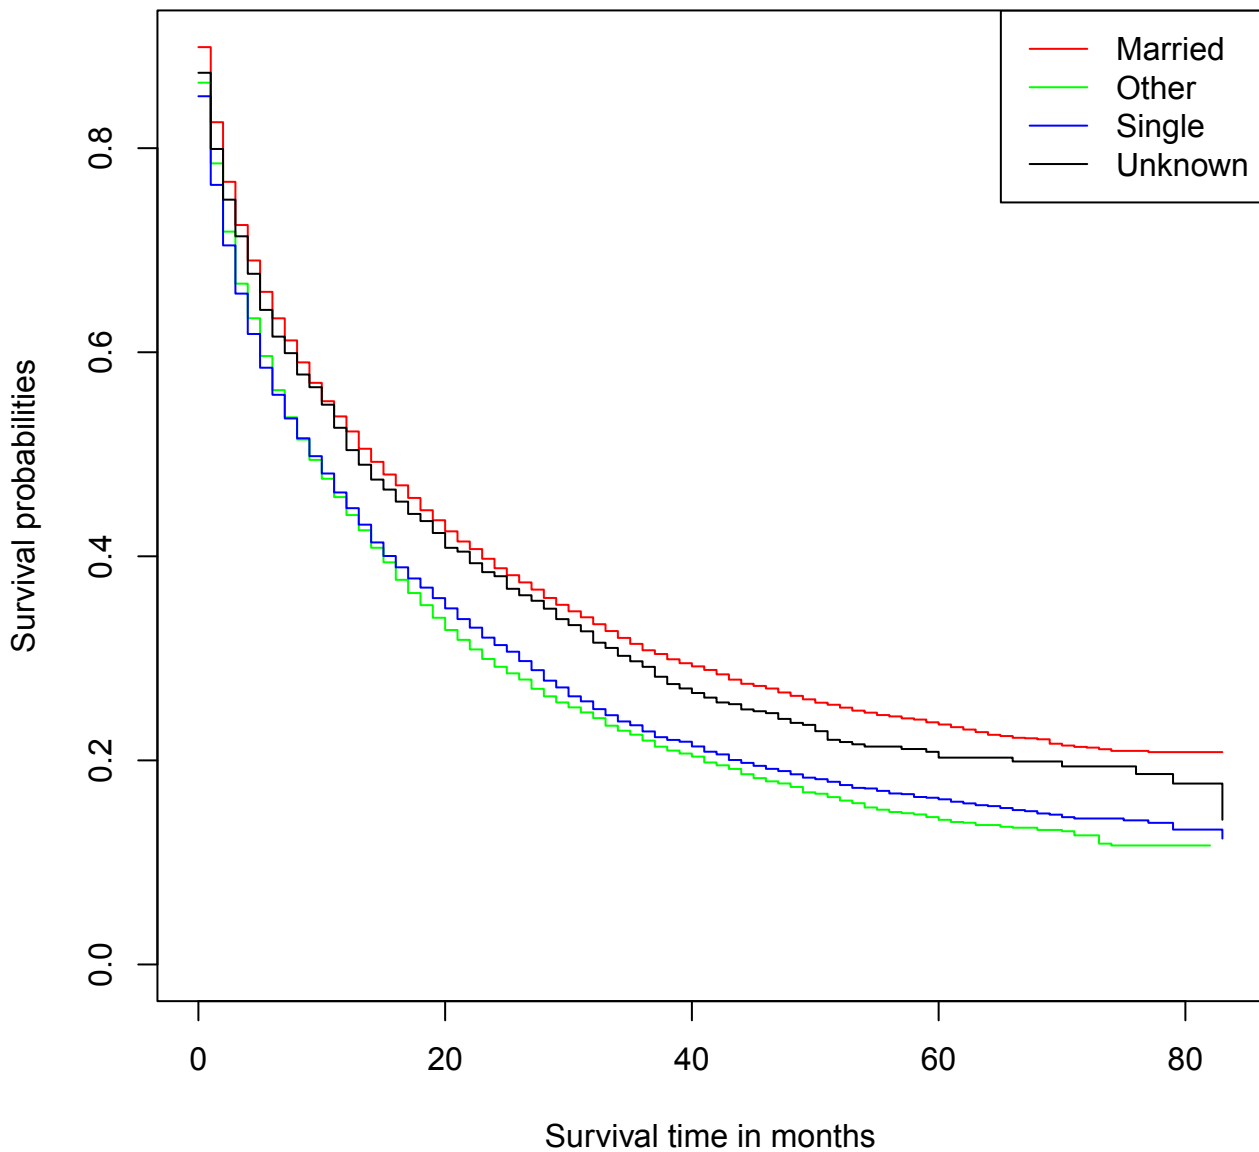

H

### Survival curve of insurance (P=0)

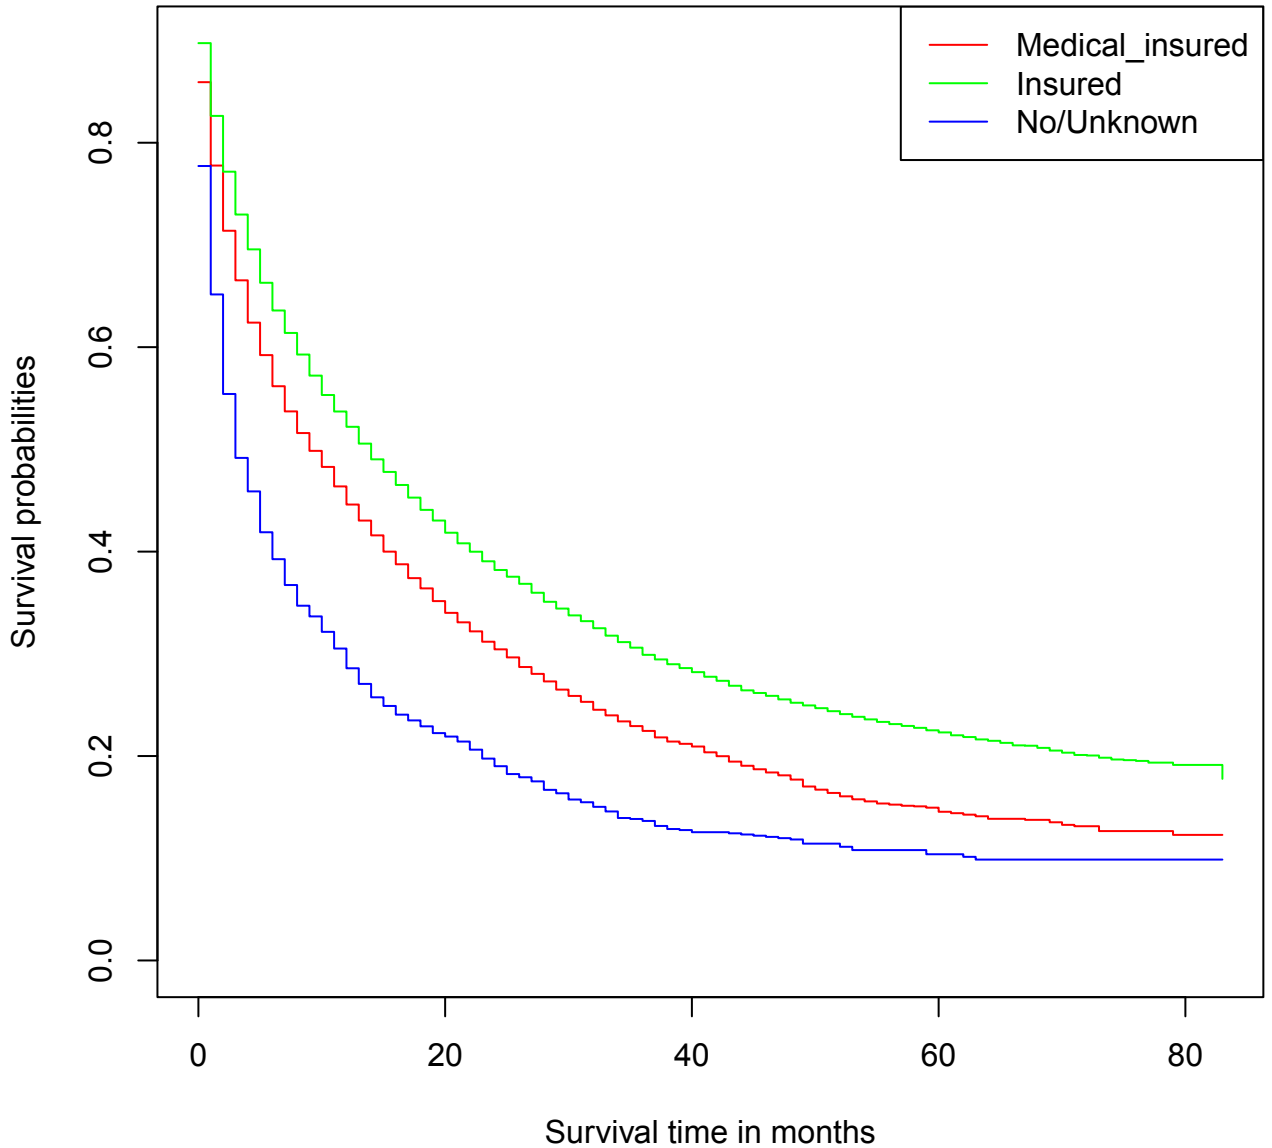



I

### Survival curve of residence (P=0)

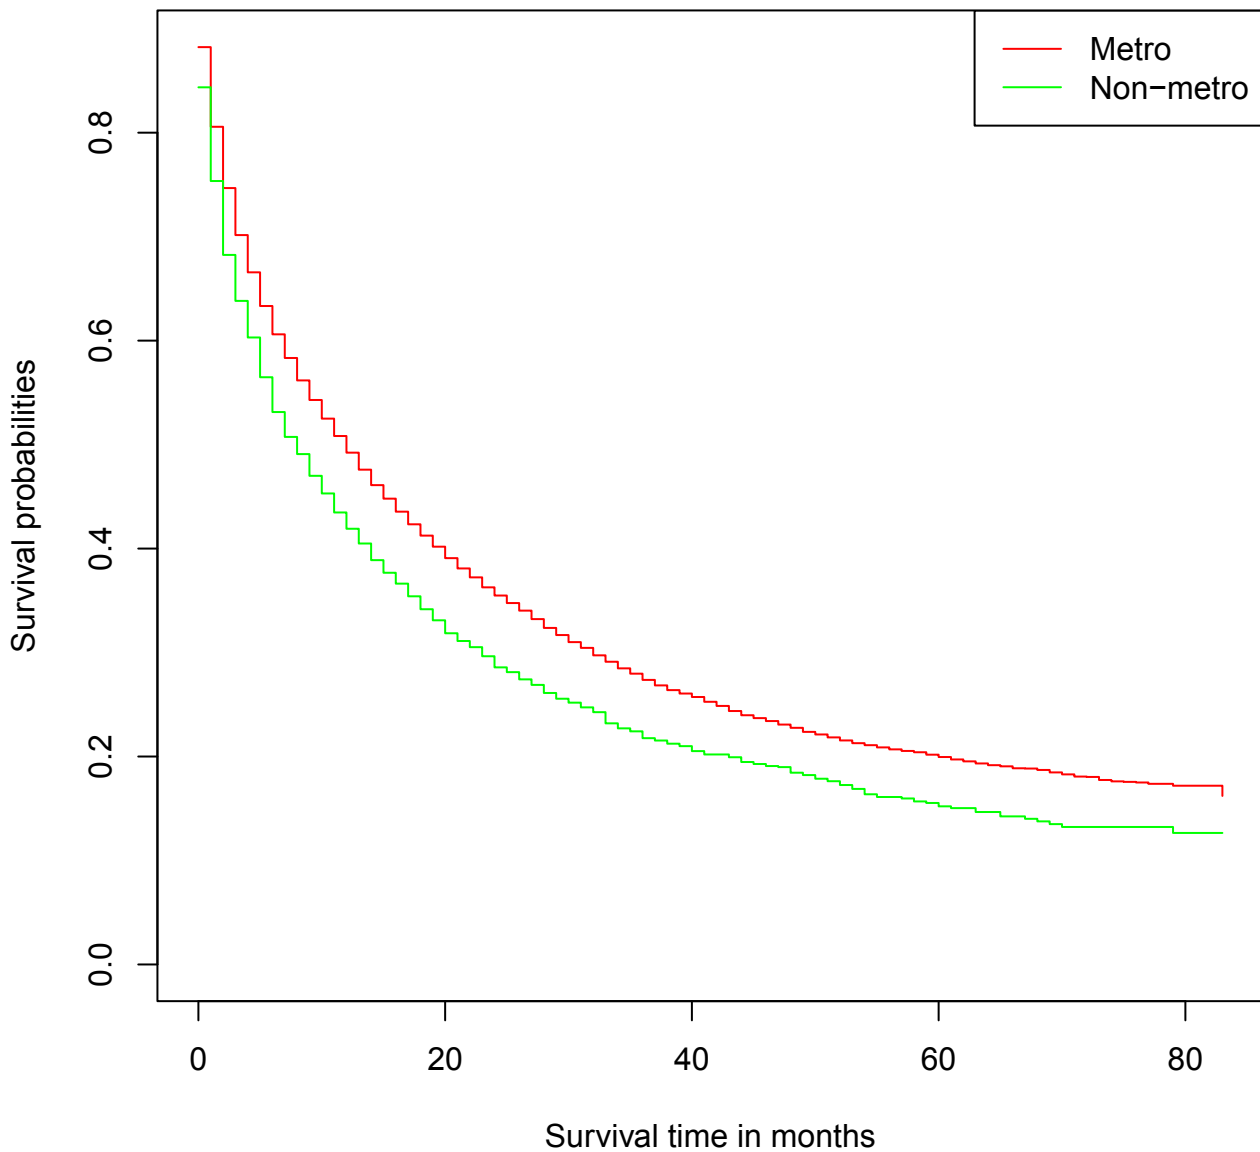

# Survival curve of poverty (P=0)

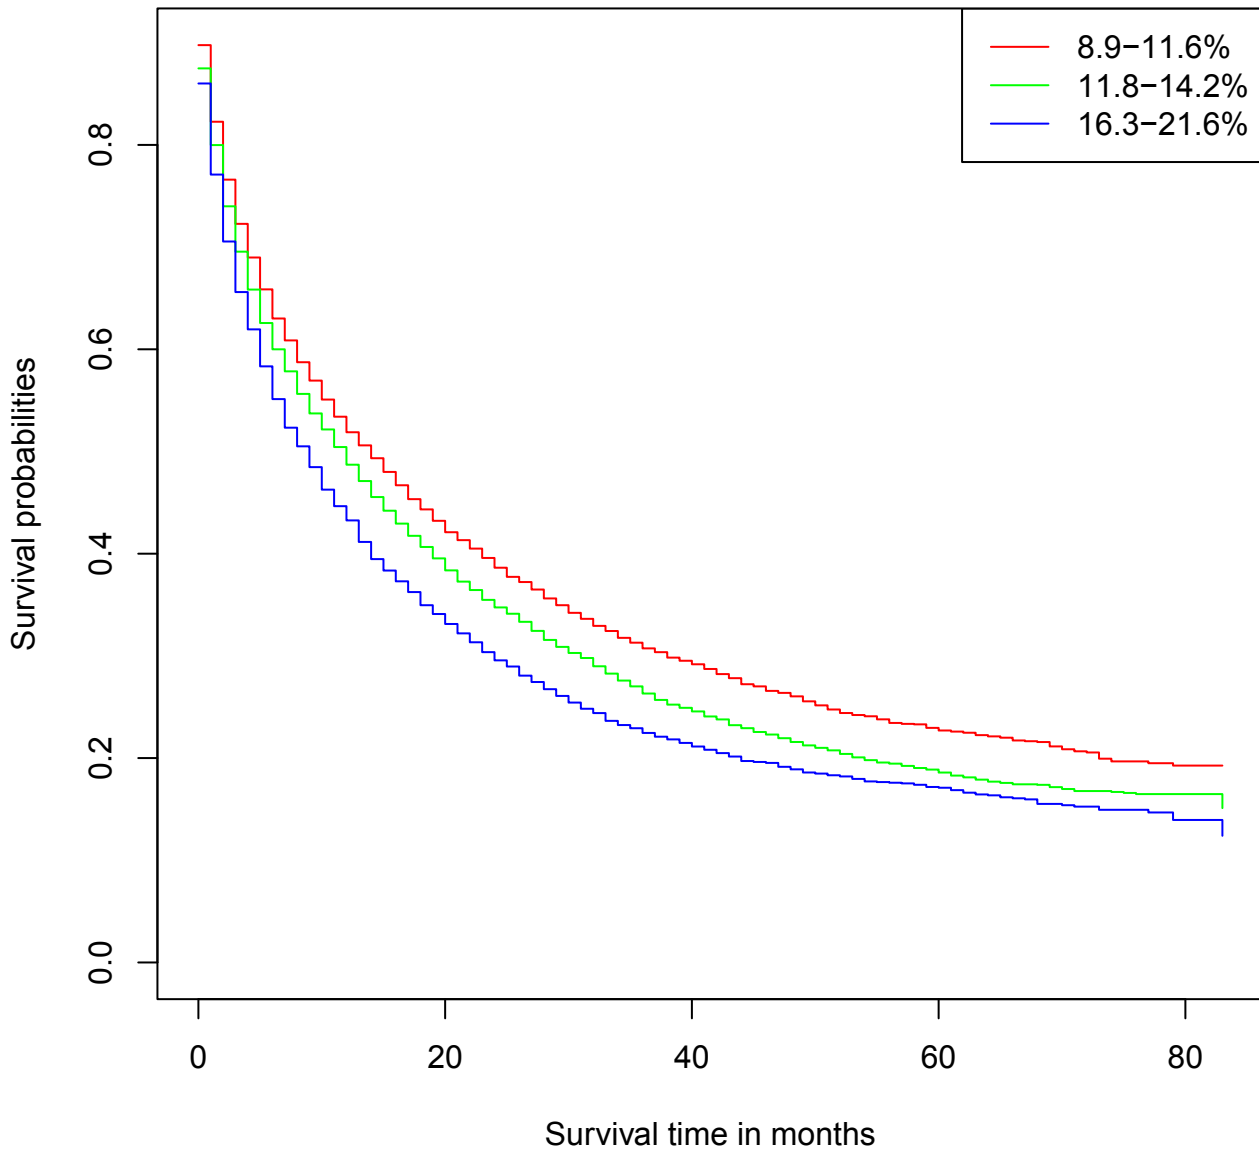

K

### Survival curve of bone (P=0)

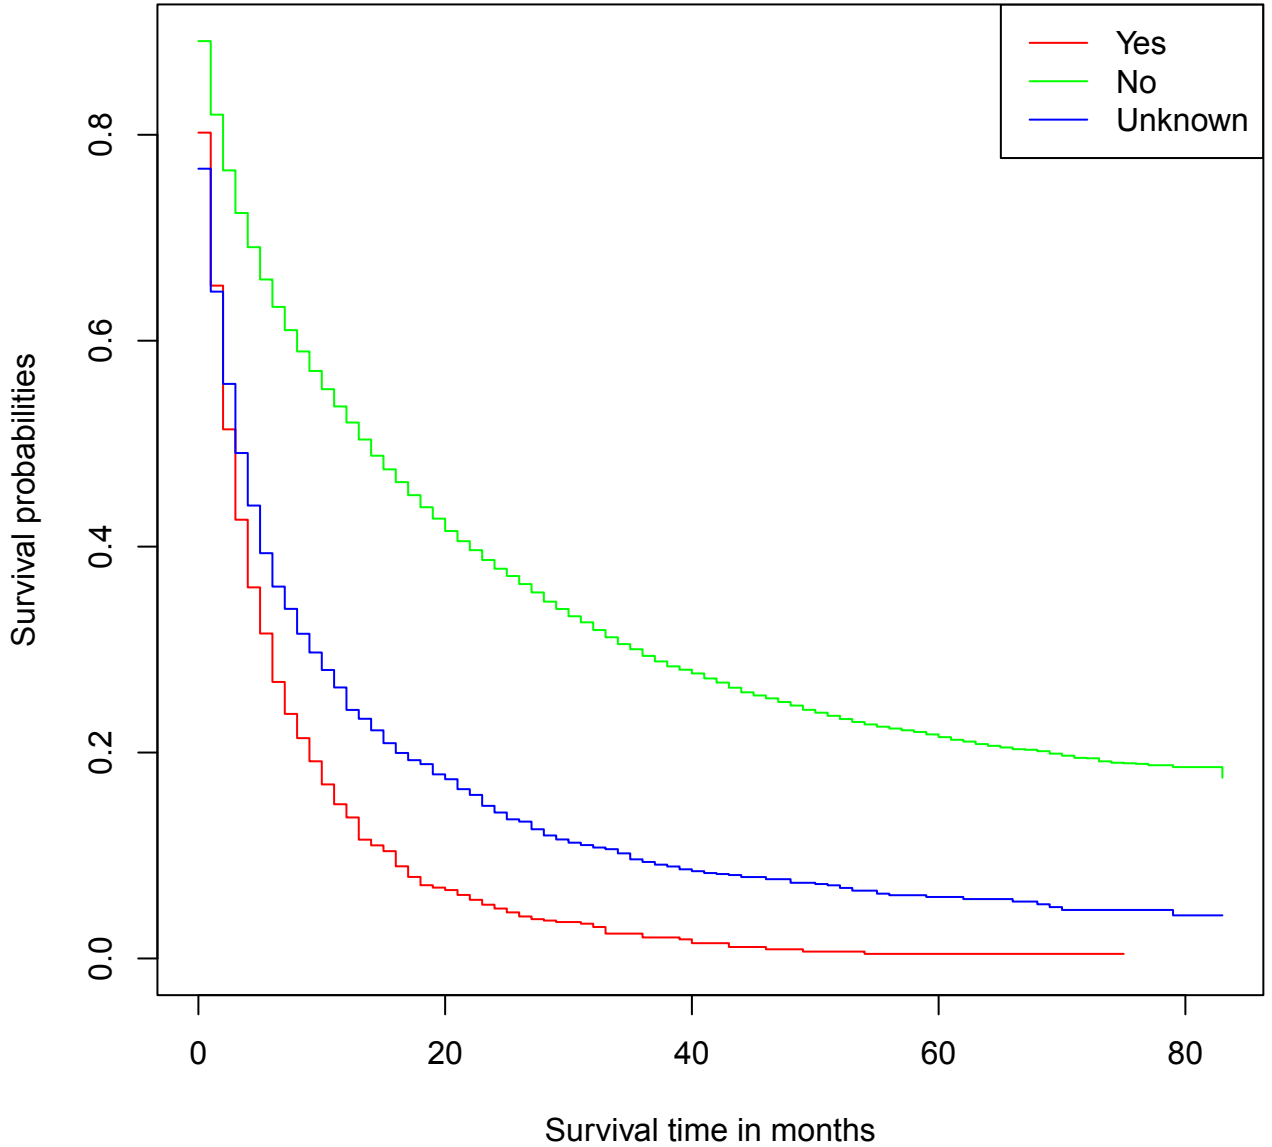

L

### Survival curve of brain (P=0)

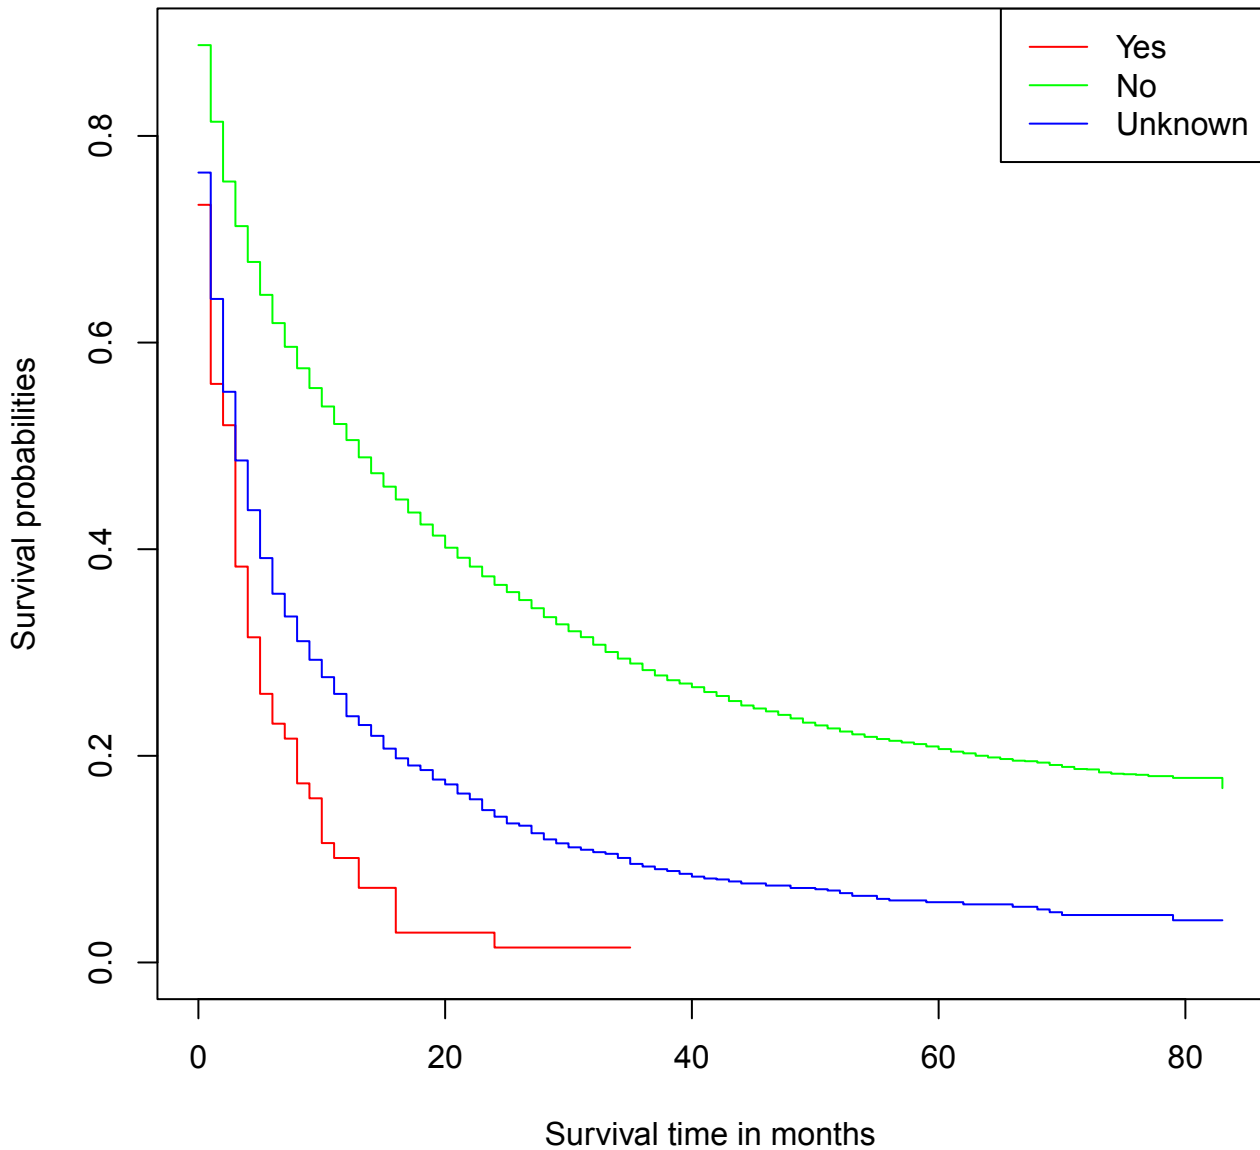

M

### Survival curve of lung (P=0)

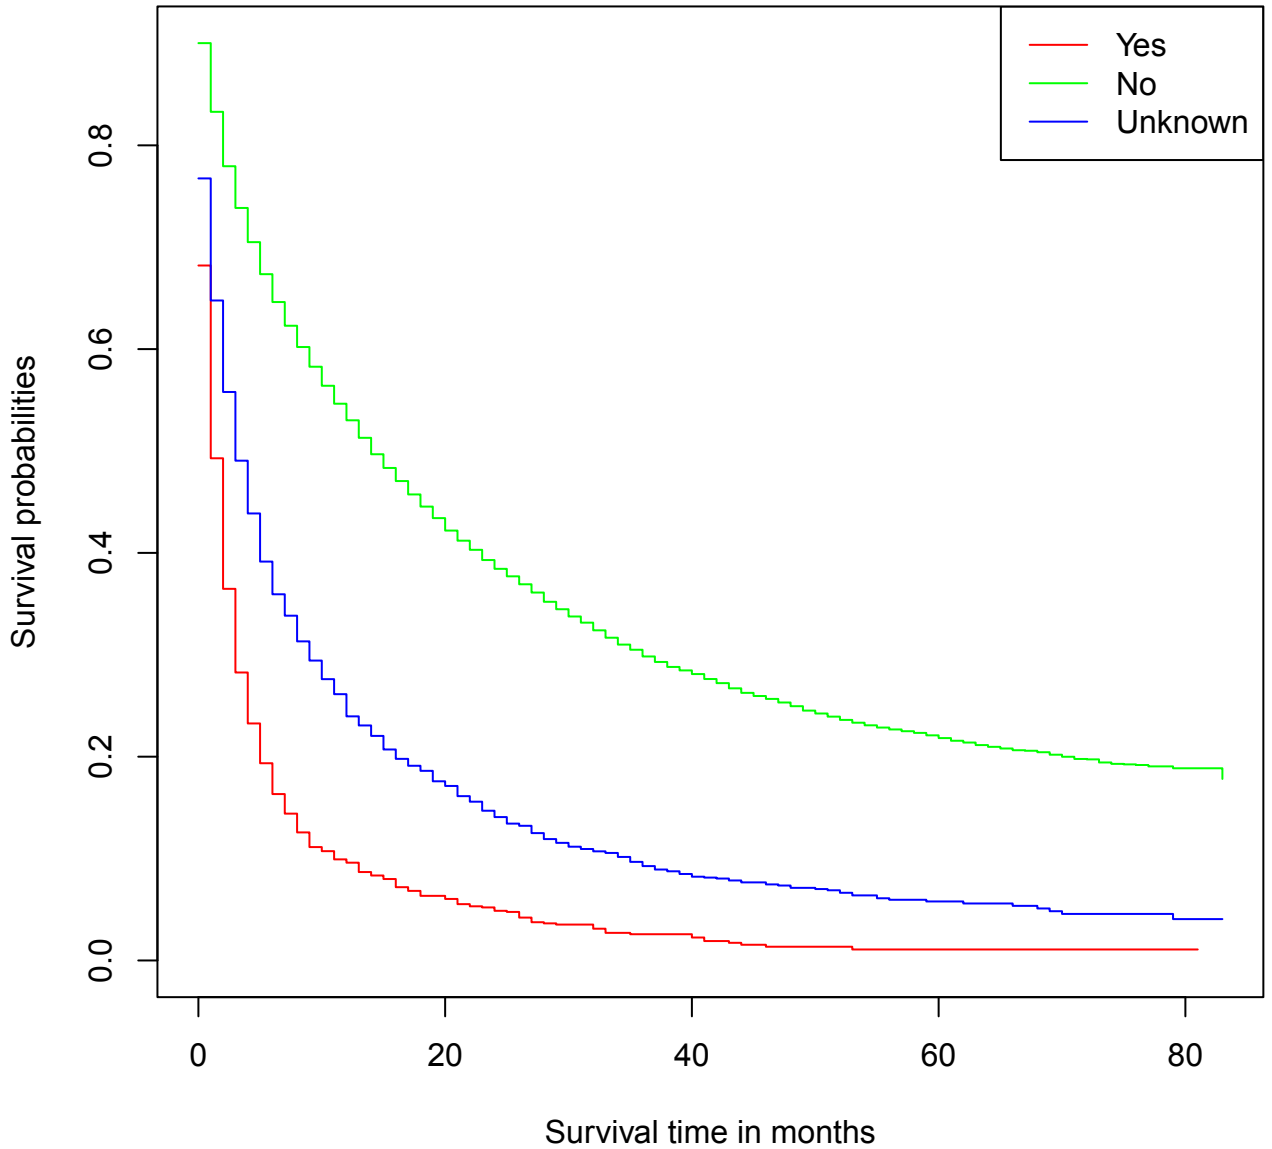

N

## Survival curve of AFP (P=0)

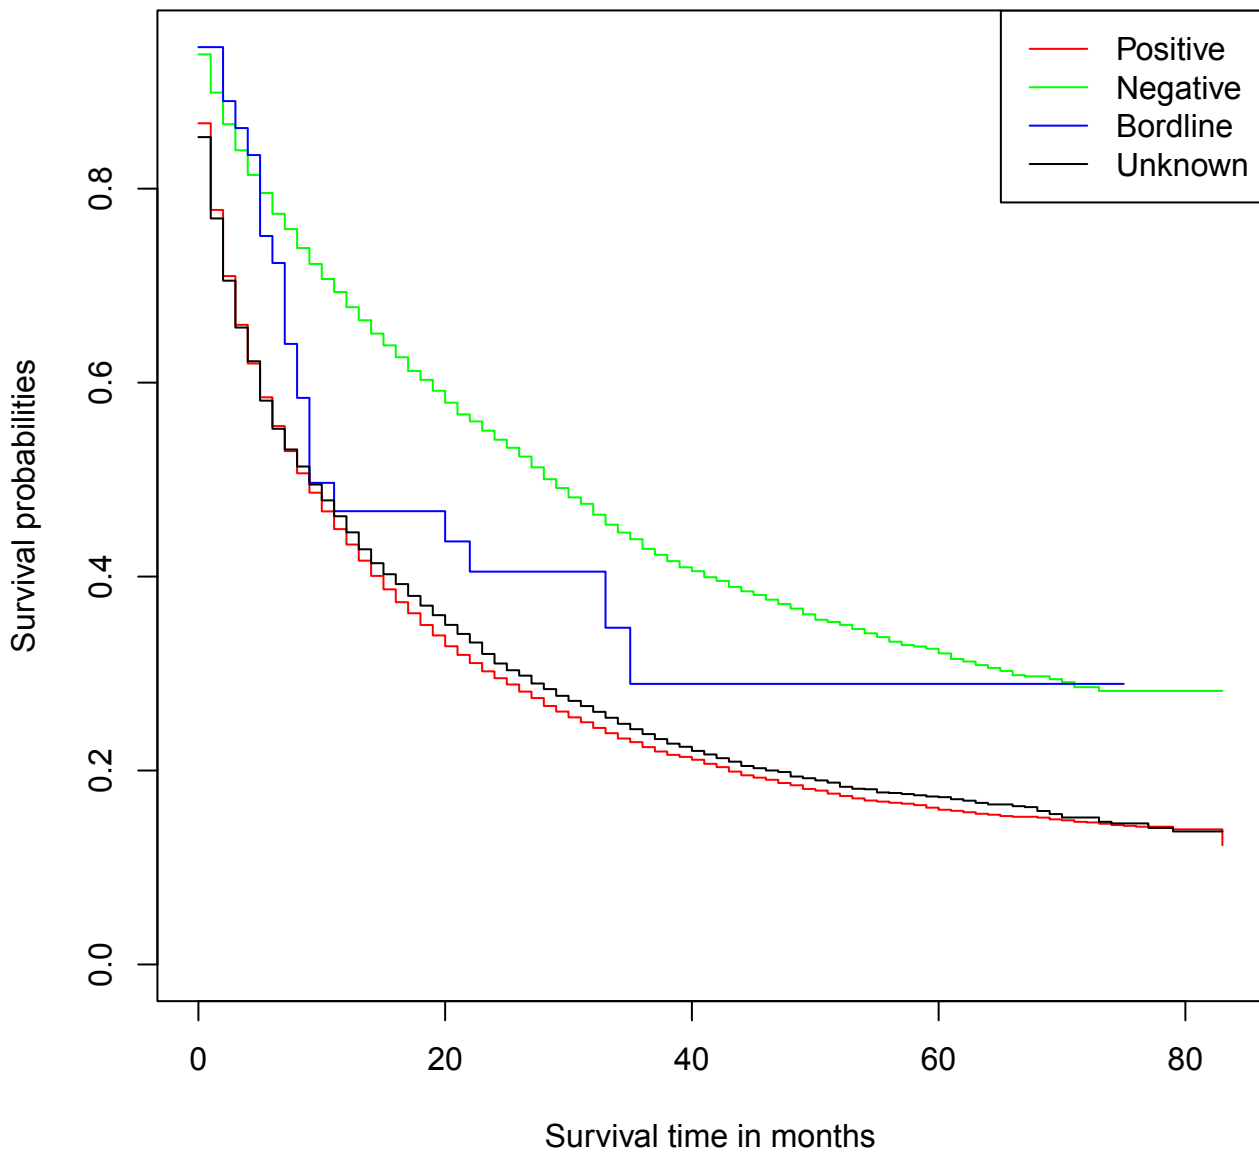

○

### Survival curve of fibrosis (P=0)

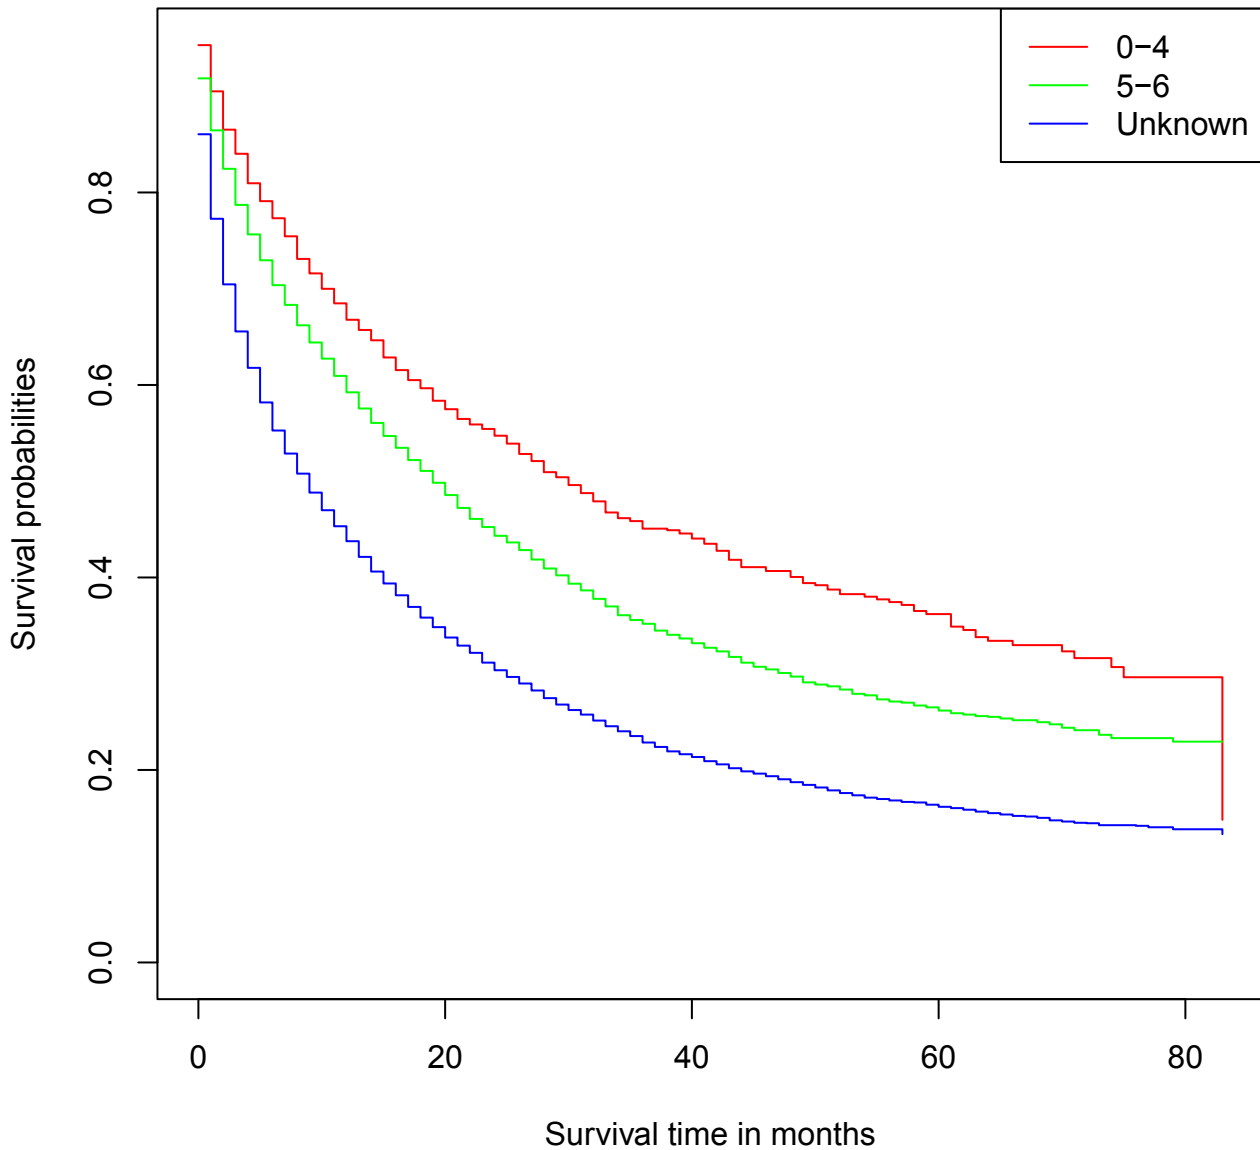

P

### Survival curve of chemotherapy (P=0)

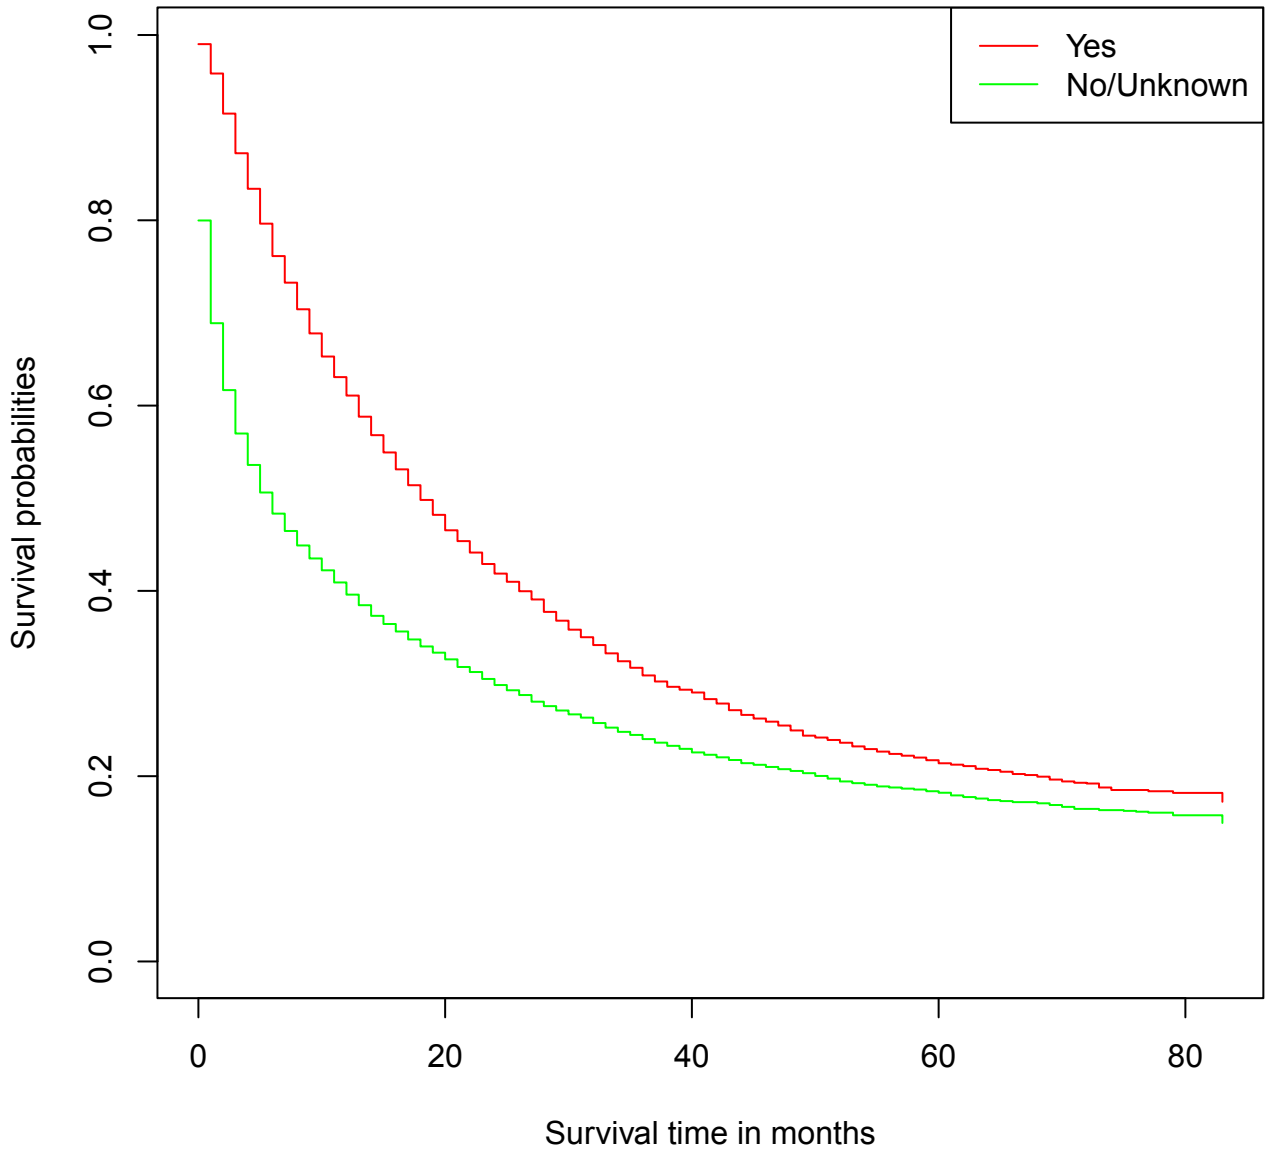



# Survival curve of radiotherapy (P=0.7049)

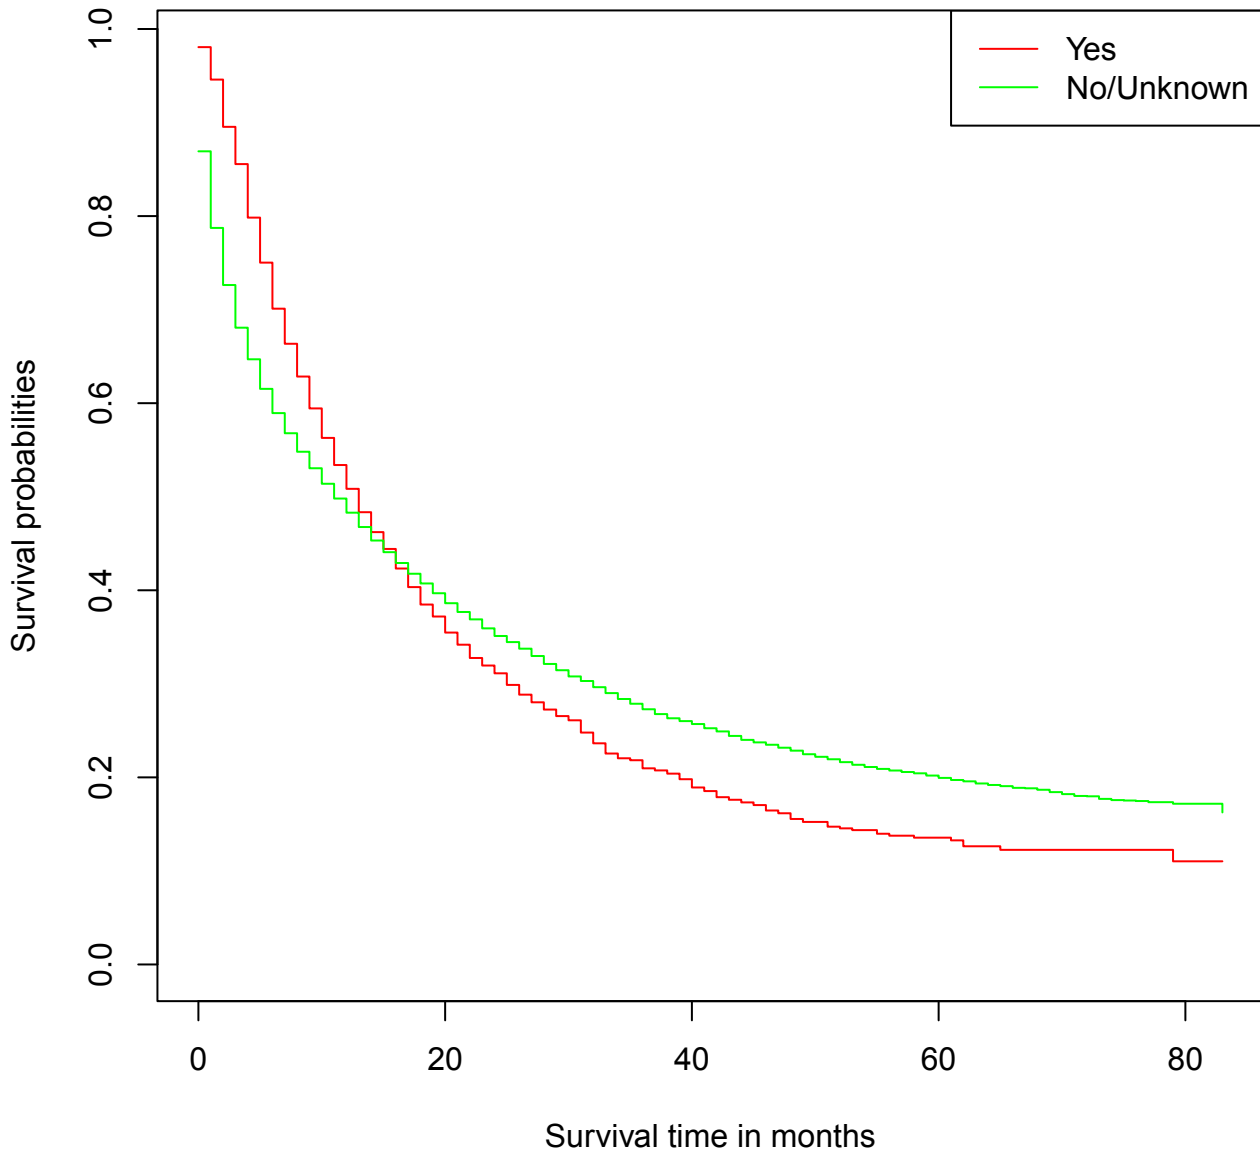

R

### Survival curve of T (P=0)

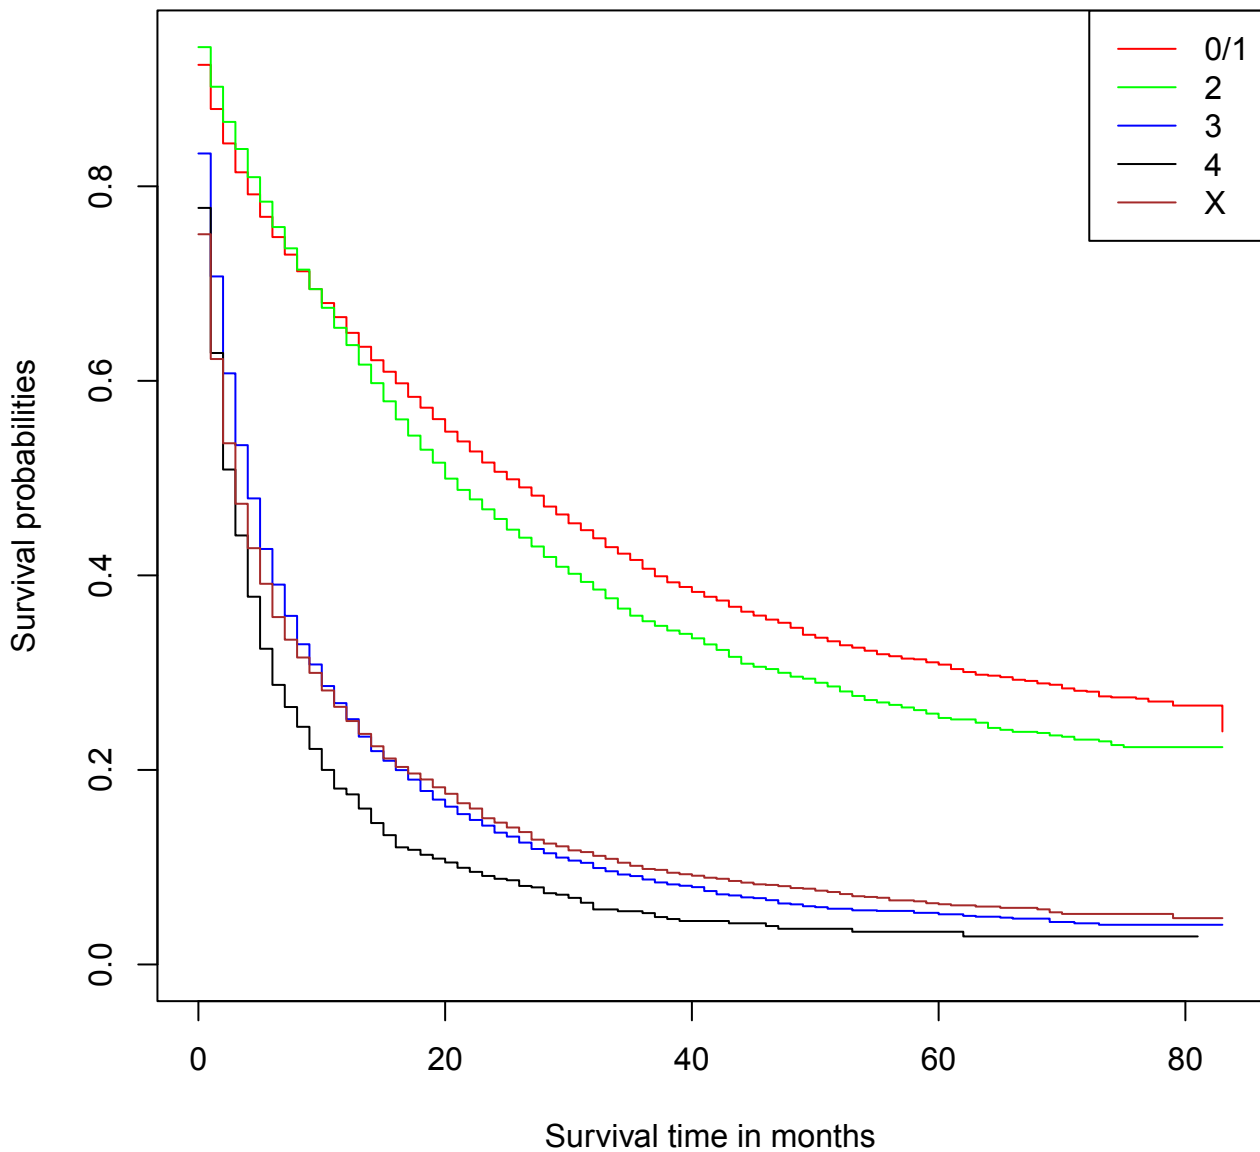

S

### Survival curve of N (P=0)

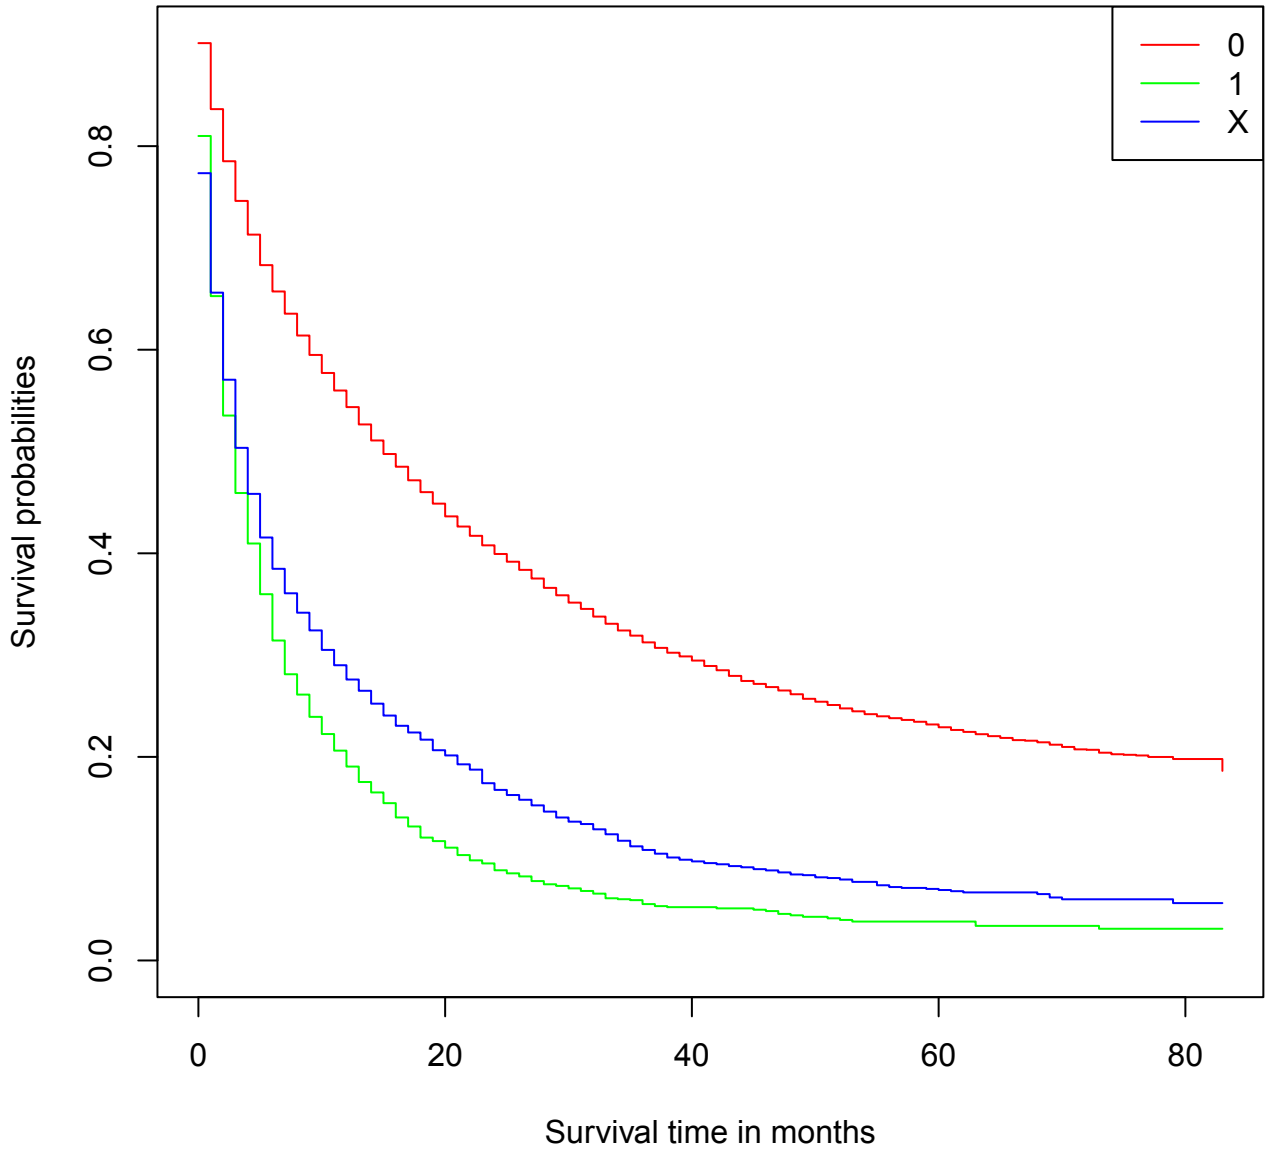

T

### Survival curve of M (P=0)

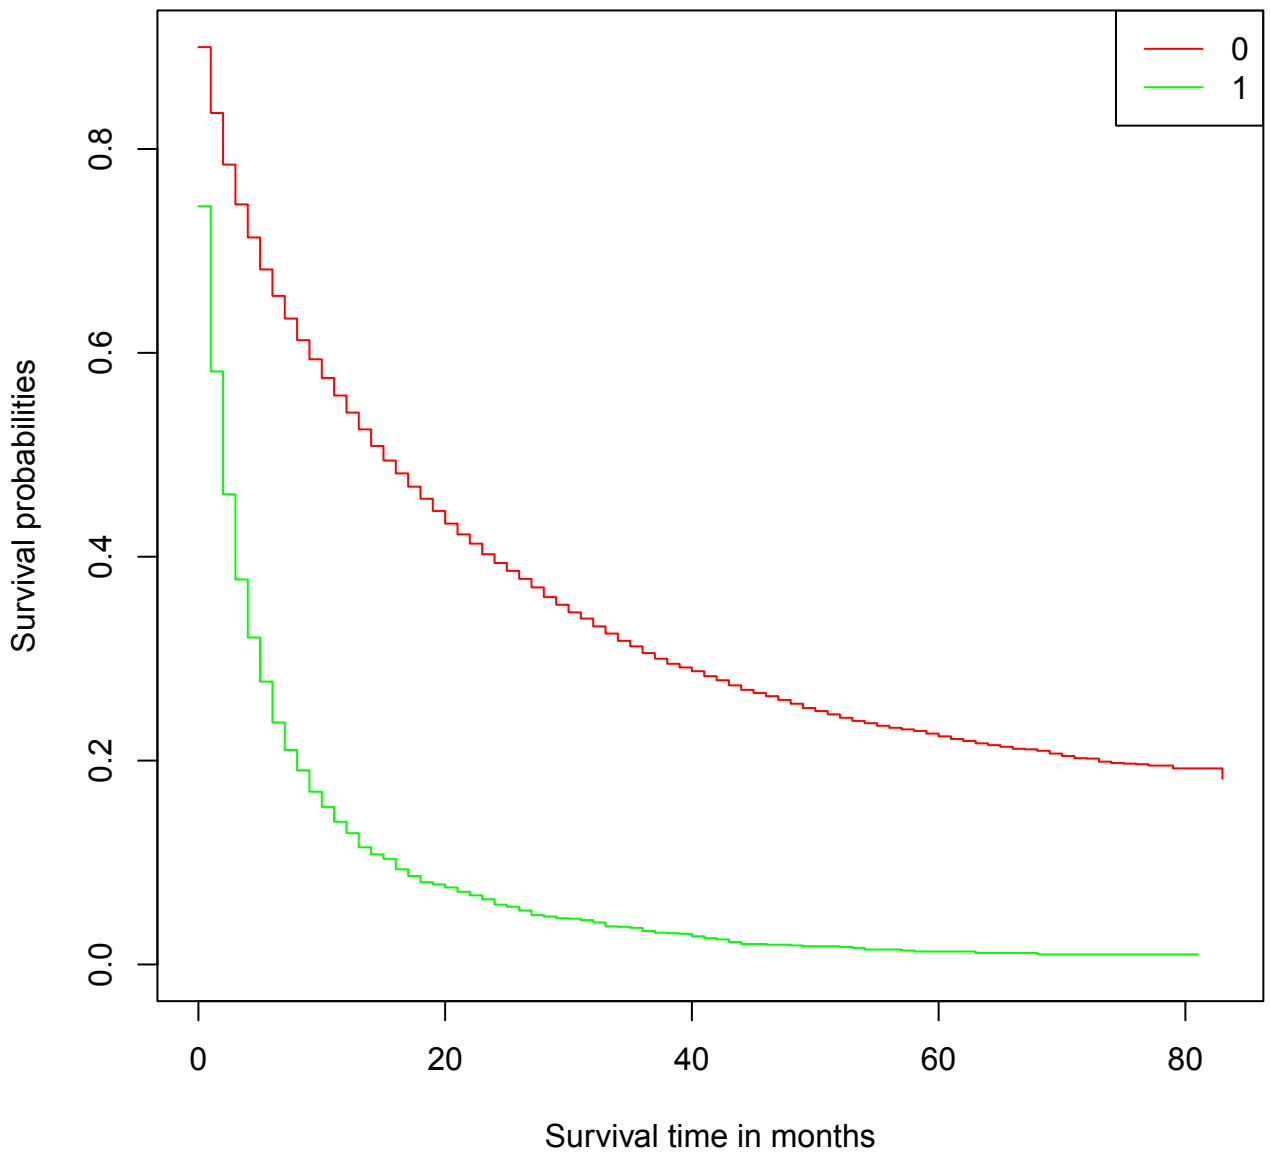

U

### Survival curve of Node (P=0)

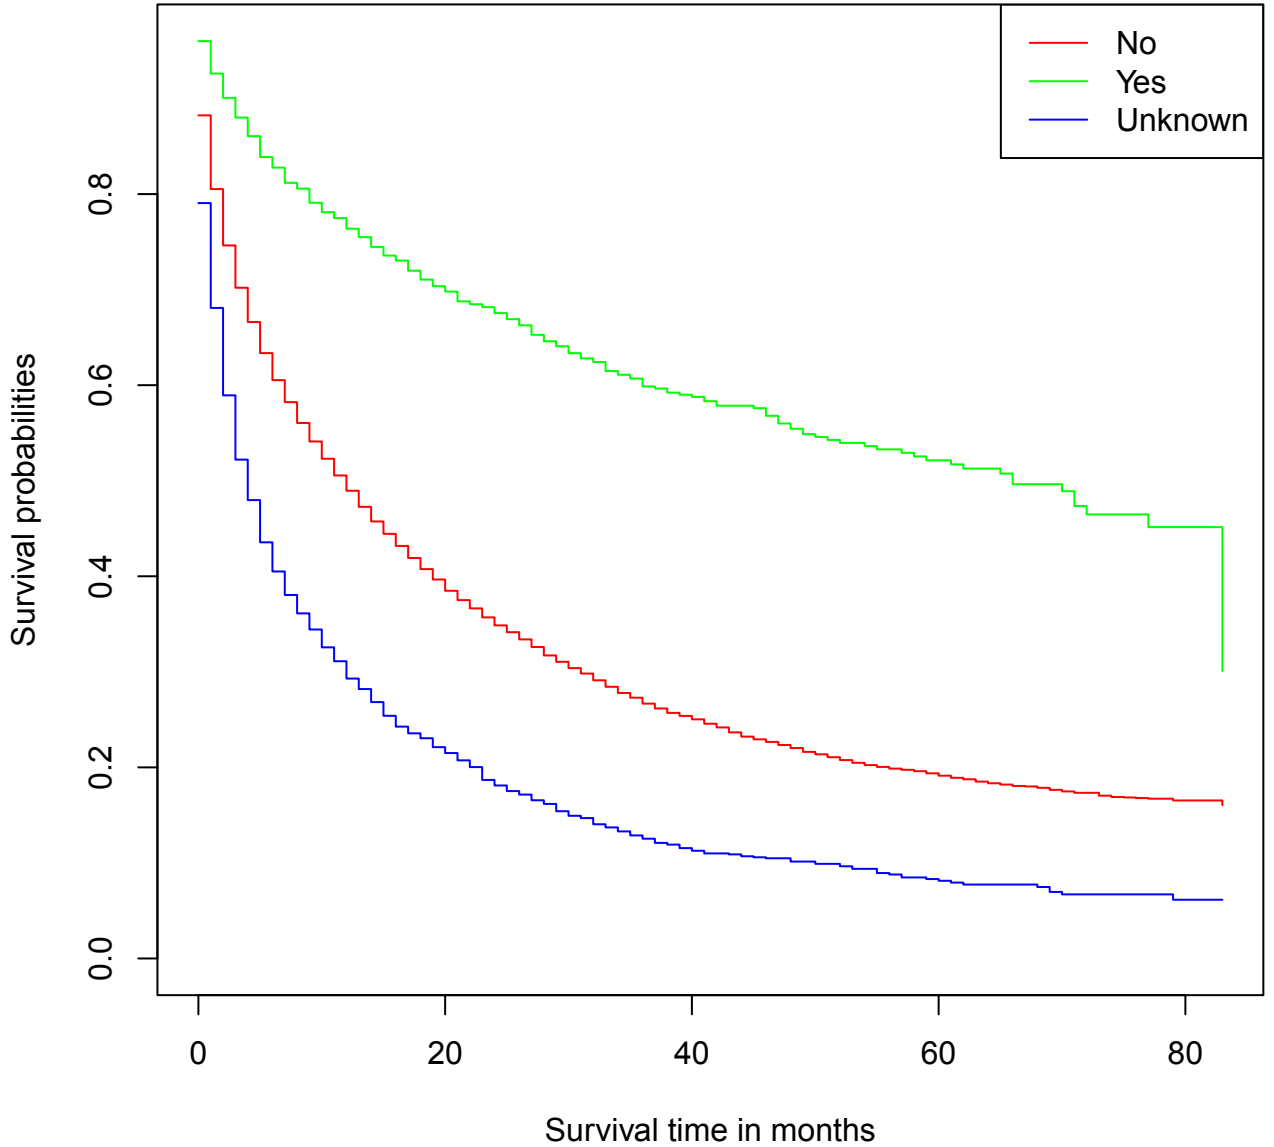

V

### Survival curve of surgery (P=0)

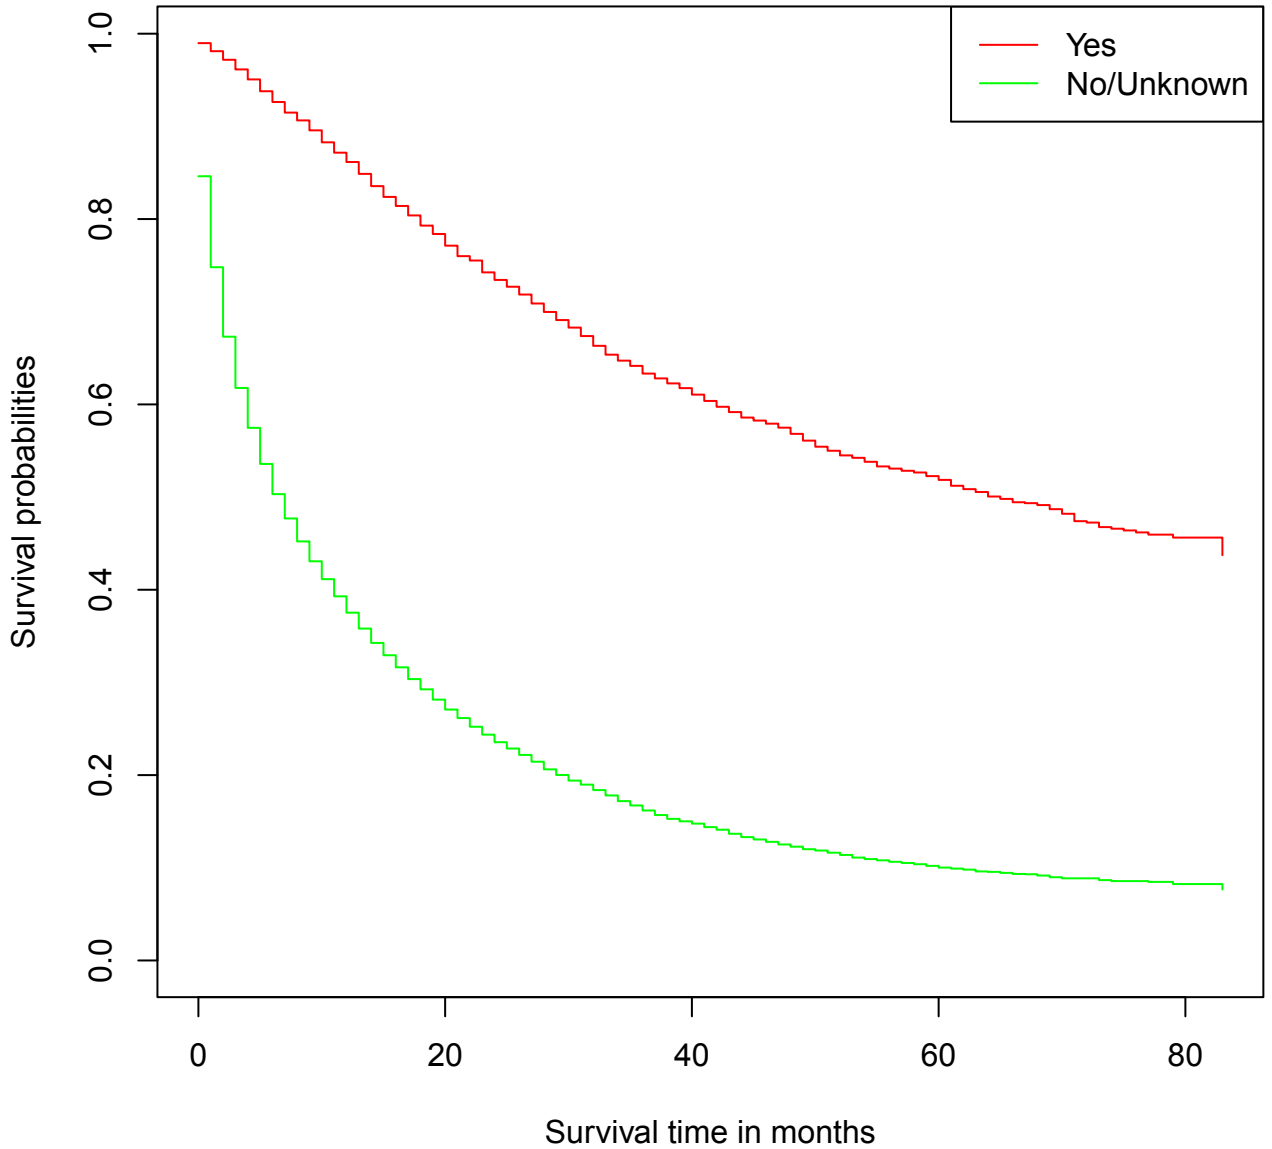

W

### Survival curve of surgery\_lymph (P=0)

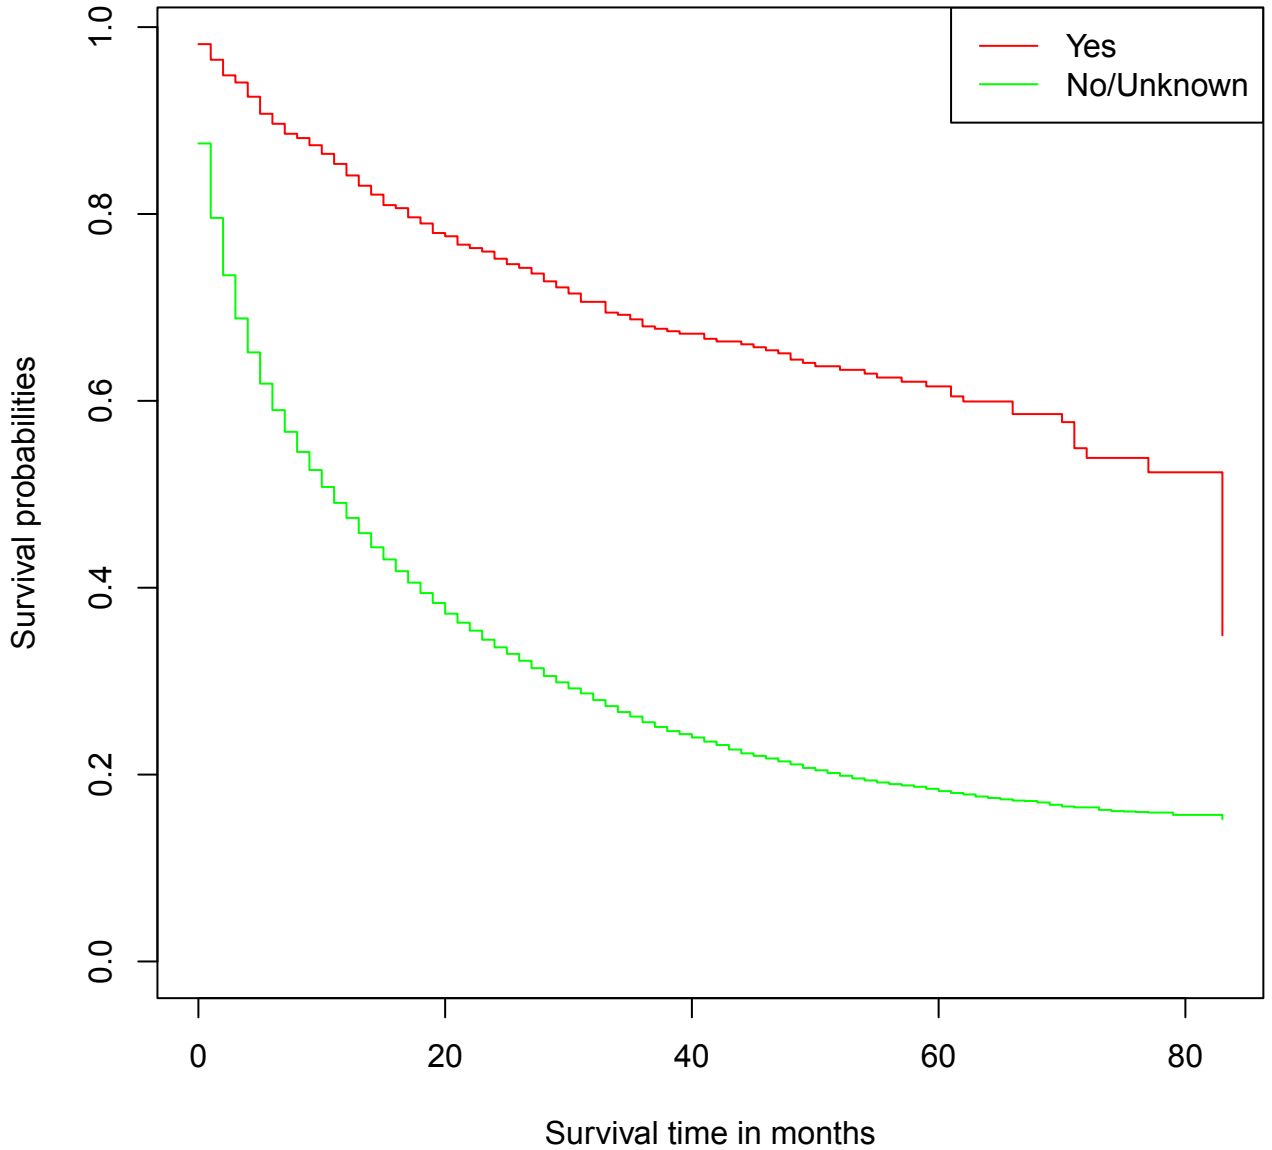

X

### Survival curve of number (P=0)

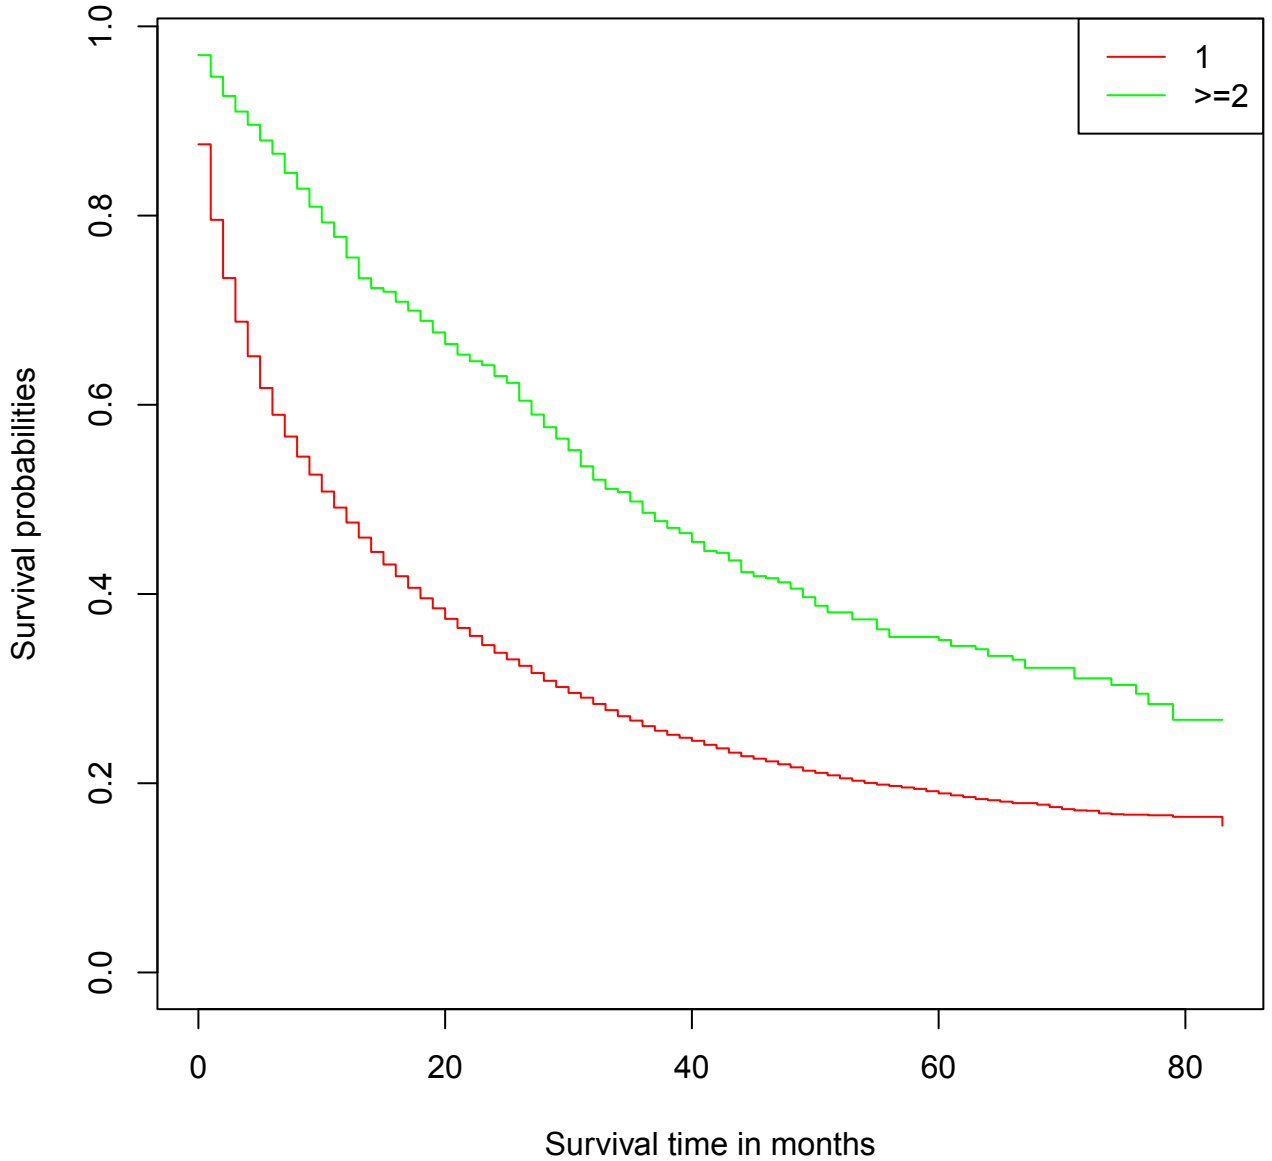



Y

## Survival curve of size (P=0)

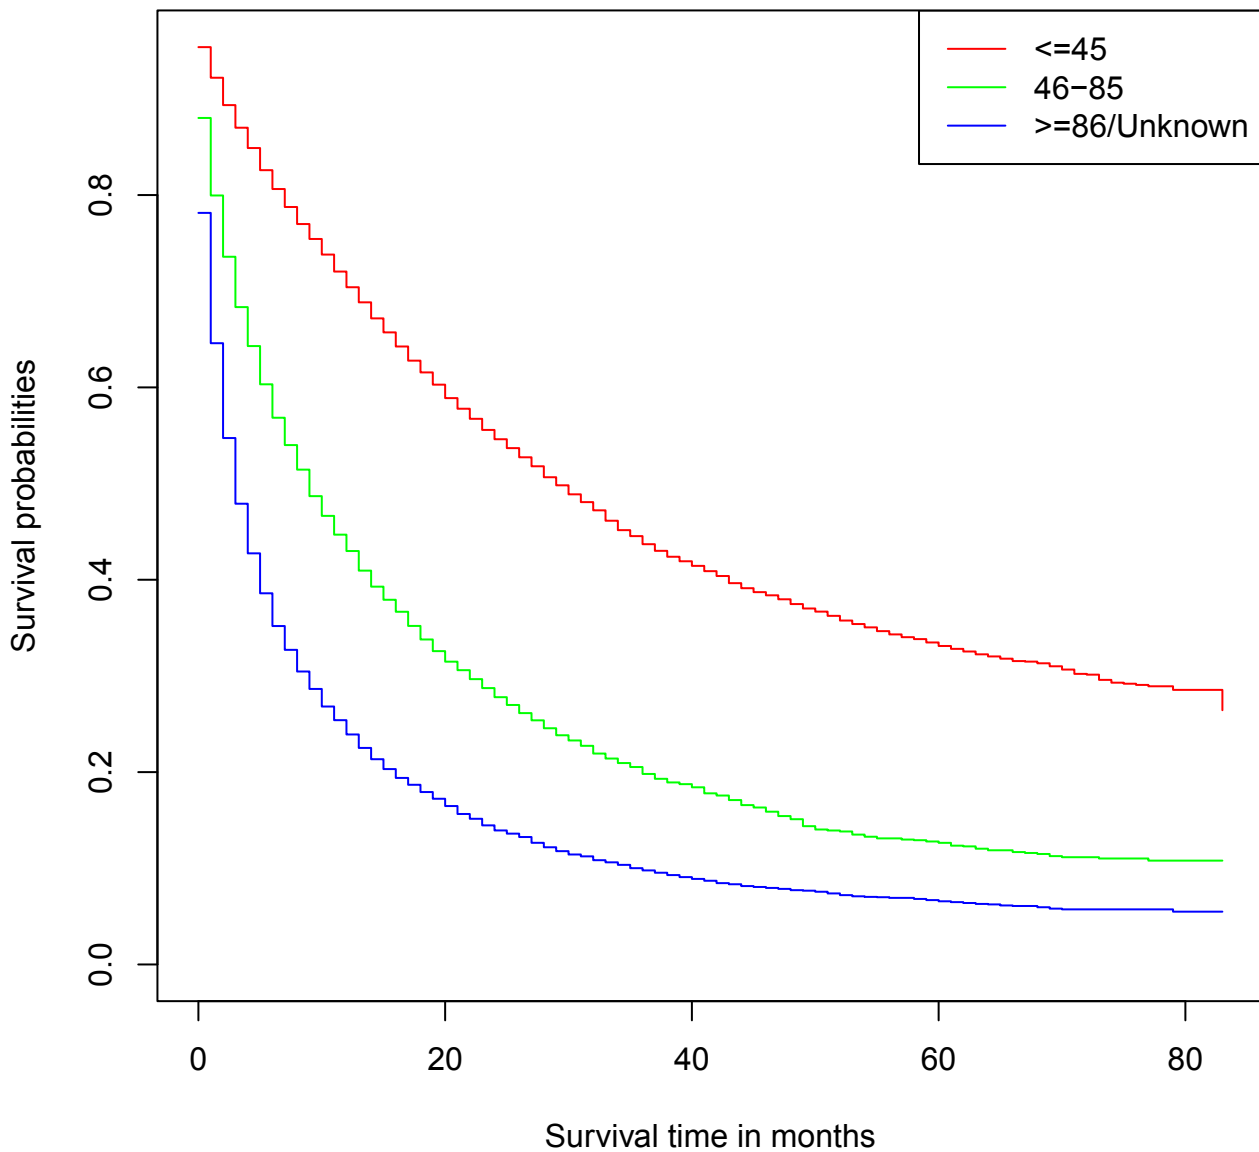

Supplement: CAM4-10-7347-s002.pdf [file CAM4-10-7347-s002.pdf]
